# Supplementary material for: Lipidomic Profiling of Saccharomyces cerevisiae and Zygosaccharomyces bailii Reveals Critical Changes in Lipid Composition in Response to Acetic Acid Stress
Source: PLoS One. 2013 Sep 4;8(9):e73936. doi: 10.1371/journal.pone.0073936 (PMC3762712; doi:10.1371/journal.pone.0073936)
Supplement: Data S1 — Complete dataset from the lipidome analysis. The spreadsheet contains raw data from all biological replicates and the statistical parameters mean, median, standard deviation and variance. (XLSX) [file pone.0073936.s007.xlsx]

## Sheet: PC
Phosphatidylcholine (PC)
Raw data
Yeast	Acetic acid in culturing media (g/L)	Biological replicates	LysoPC14:2	LysoPC14:1	LysoPC14:0	LysoPC16:2	LysoPC16:1	LysoPC16:0	LysoPC18:2	LysoPC18:1	LysoPC18:0	LysoPC20:2	LysoPC20:1	LysoPC20:0	LysoPC22:2	LysoPC22:1	LysoPC22:0	PC28:4	PC28:3	PC28:2	PC28:1	PC28:0	PC30:4	PC30:3	PC30:2	PC30:1	PC30:0	PC32:4	PC32:3	PC32:2	PC32:1	PC32:0	PC34:4	PC34:3	PC34:2	PC34:1	PC34:0	PC36:4	PC36:3	PC36:2	PC36:1	PC36:0	PC38:4	PC38:3	PC38:2	PC38:1	PC38:0	PC40:4	PC40:3
S. cerevisiae	0	S. cerevisiae repl 1	0	0.00981692	0.0146838	0.00177295	2.20436	0.159428	0.00127803	3.64559	0.117979	0	0.0048143	0.00125088	0	0	0	0	0	0.0084513	0.870889	0.262258	0.000982831	0.00101962	0.462076	1.78003	0.199869	0	0.0299501	94.665	21.8198	0.912217	?	0.0903329	179.132	31.8664	1.20059	0.0223695	0.0389418	16.1253	5.37437	0.461783	0.00554835	0.00338472	0.245323	0.0308549	0.0583103	0.00147337	0.00314471
		S. cerevisiae repl 2	0	0.012551	0.0213526	0.00106866	4.92248	0.319679	0.00156984	6.62666	0.201393	0.000940355	0.00845028	0.00373903	0.00114186	0.000504623	0	0.000451232	0	0.0114014	1.47347	0.414716	0.00161548	0.00349447	0.700092	2.74523	0.293244	0.00134595	0.0504683	154.056	32.981	1.45831	0.00128739	0.127825	260.82	46.2631	1.71848	0.0285594	0.0848179	22.3322	7.34114	0.731714	0.0452541	0.037181	0.316912	0.0466311	0.114939	0.00743242	0.0138306
		S. cerevisiae repl 3	0	0.012122	0.0162229	0.0011202	3.70362	0.233526	0.000978792	5.72567	0.165666	0.000335635	0.00738396	0.000704492	0.000308375	0.000276004	0.000340746	0.000248744	0	0.0120828	1.14687	0.256327	0.00106653	0.00063975	0.562492	1.99841	0.200623	0.000758159	0.04072	126.443	24.2268	0.979031	0.000870605	0.102533	211.64	34.9665	1.24688	0.00999407	0.0352007	20.5407	5.78103	0.583678	0.0149638	0.00931088	0.281086	0.0375382	0.0997772	0.00334527	0.00418606
		S. cerevisiae repl 4	0	0.00973493	0.0172949	0.000968171	4.15433	0.264847	0.00118108	7.00481	0.203185	0.00105994	0.00867591	0.00113152	0.00131873	0	0.000315688	0.000436824	0.000396445	0.0154045	1.32921	0.314338	0.000669919	0.00092871	0.638385	2.3515	0.242926	0.000833269	0.0502072	136.991	29.2706	1.17313	0.000652483	0.132566	264.913	43.9789	1.65094	0.0153356	0.0517416	26.2029	7.81971	0.774905	0.0768113	0.0651005	0.411245	0.047455	0.132715	0.00760679	0.00759211
	9	S. cerevisiae with acetic acid repl 1	0	0.00649695	0.00761738	0.00270884	1.11004	0.124311	0.00178354	1.90246	0.082657	0	0.00528506	0.0011997	0.000978659	0	0	0	0	0.00595579	1.29171	0.215127	0.00212195	0.00522409	0.53543	1.60787	0.126524	0.00285213	0.0453628	130.831	22.3598	0.816145	0.00141159	0.110323	197.334	24.5696	0.816915	0.00691463	0.0327348	11.8996	2.7564	0.262694	0.00787957	0.0061372	0.151819	0.019032	0.0275976	0.0021311	0.00895274
		S. cerevisiae with acetic acid repl 2	0	0.0103674	0.0145952	0.00305639	1.88092	0.185007	0.00126619	3.35318	0.122735	0.00113743	0.00616107	0.00130554	0.00144861	0.00124116	0	0	0	0.00768837	1.85176	0.303109	0.00176695	0.00677092	0.805459	2.28371	0.177827	0.00171687	0.0623189	178.695	31.0354	1.10382	0.00210138	0.145793	257.279	32.9968	1.10672	0.0280673	0.10077	13.6043	3.48429	0.353282	0.032068	0.01824	0.158716	0.0257424	0.0432187	0.00367161	0.00413123
		S. cerevisiae with acetic acid repl 3	0	0.0110802	0.0149995	0.00464994	1.57906	0.151681	0	2.67912	0.103195	0	0.0053277	0.00257701	0	0	0	0	0	0.00582234	1.51575	0.267824	0.00316226	0.00553538	0.677362	2.036	0.166756	0.00366822	0.0528466	154.056	26.8115	1.01127	0.00188792	0.125226	220.721	28.1097	0.93381	0.0349567	0.0774537	12.1667	3.08874	0.30663	0.0517346	0.0259475	0.151838	0.0237198	0.0343148	0.00498788	0.0113917
		S. cerevisiae with acetic acid repl 4	0.00106942	0.00848284	0.00934816	0.00394202	1.5255	0.132256	0.00125665	2.56412	0.0922131	0.00106605	0.00461504	0.00153497	0.00113352	0	0	0	0	0.00636255	1.65342	0.23396	0.00196679	0.00357598	0.687533	1.9459	0.142746	0.00127184	0.0446627	153.858	24.7727	0.847926	0.00113015	0.115137	216.52	24.6028	0.778852	0.0487852	0.101045	10.3924	2.46842	0.272787	0.0534238	0.0347714	0.116472	0.0173098	0.0292994	0.00524927	0.0106807
Z. bailii	0	Z. bailii repl 1	0.000656082	0.00445206	0.00869916	0.0317011	1.51727	0.195057	8.14518	4.6368	0.286876	0.00553074	0.00647102	0.0042228	0.00105332	0.00068672	0.000855759	0	0.000811386	0.00971234	0.00560047	0.00522858	0.00145796	0.00106494	0.0160439	0.0332637	0.00345684	0.00392698	0.251105	3.78961	1.02352	0.0658089	2.23982	99.9403	58.2926	7.209	0.253966	218.536	134.982	34.6692	5.10455	0.252455	0.253576	0.351849	0.182596	0.0637467	0.0227664	0.0112548	0.0103209
		Z. bailii repl 2	0.000489503	0.0044015	0.0068339	0.0211856	1.30439	0.175072	7.1238	5.30608	0.29607	0.0040107	0.00521331	0.00366019	0.00122275	0.000680872	0.000542885	0	0.00063857	0.00566756	0.00397142	0.002935	0.0012721	0.00129325	0.0139488	0.0388943	0.00326235	0.00313846	0.207964	4.26906	1.22023	0.0710968	1.40784	77.5404	55.0336	7.52762	0.279549	137.349	108.219	31.4266	5.0804	0.249708	0.193298	0.269916	0.150263	0.0567793	0.0148039	0.0273799	0.0082732
		Z. bailii repl 3	0.000743162	0.00429527	0.00956107	0.041556	2.18735	0.355934	12.0874	7.78823	0.501738	0.00720685	0.0111721	0.00626361	0.00181893	0.00103159	0.00125246	0.000740564	0.000945843	0.0124428	0.00928563	0.00609211	0.00145514	0.00155778	0.0203798	0.0459669	0.00518265	0.0083151	0.268175	4.58168	1.41761	0.085691	2.17336	103.142	66.0341	9.12516	0.371929	219.633	141.924	39.0365	6.68619	0.338796	0.295219	0.34699	0.180179	0.0695688	0.0296057	0.0259613	0.019608
		Z. bailii repl 4	0.00150802	0.00769641	0.0111499	0.0289965	1.39501	0.194034	8.32877	6.40222	0.363309	0.00537002	0.00844779	0.00691876	0.00327613	0.00161836	0.00228042	0	0.00178125	0.0195872	0.00873022	0.00786324	0.00237762	0.00215694	0.0157646	0.0487689	0.00620941	0.00958143	0.230662	4.87589	1.47808	0.101216	1.72316	95.9671	70.2074	10.5902	0.40636	172.878	131.552	40.0383	6.87535	0.353931	0.288937	0.353253	0.206124	0.090422	0.0313111	0.0352099	0.0214879
	24	Z. bailii with acetic acid repl 1	0	0.00778003	0.004439	0.00201687	0.0210311	0.0190425	0.090745	0.0784011	0.0527402	0	0	0	0	0	0	0	0	0.00406673	0.00209698	0.00568069	0	0	0	0.021884	0.00274257	0	0.0113944	0.185083	0.194741	0.0498704	0.155695	4.71909	3.79936	1.12328	0.0895811	17.0761	10.742	3.39243	1.02862	0.0811837	0.0141157	0.0153433	0.0137906	0.00649828	0.00346355	0.00425522	0.00325621
		Z. bailii with acetic acid repl 2	0	0.0120818	0.0144767	0.00412647	0.0526918	0.0257479	0.115119	0.134666	0.0697419	0	0.00306084	0.00293331	0	0	0	0	0.00270658	0.00577309	0.0131219	0.0103473	0	0	0.00654397	0.0431579	0.00588079	0.00284545	0.0140657	0.675783	0.345515	0.0622201	0.165668	4.94901	4.57596	1.22697	0.0867579	17.0504	10.6498	3.64324	1.11668	0.0969635	0.0204396	0.0202412	0.0227381	0.0121527	0.00563138	0.00328474	0.00319688
		Z. bailii with acetic acid repl 3	0.00138727	0.00711391	0.00912902	0.00154106	0.0129087	0.009175	0.0363163	0.0379398	0.0283462	0	0.00130641	0.00189461	0	0	0.0012747	0.00149666	0.00132861	0.00416815	0.00333579	0.00497038	0	0	0.00224183	0.0165743	0.00264136	0	0.00759906	0.194603	0.128287	0.0332643	0.126208	3.24379	2.25234	0.528838	0.0378478	13.6103	6.97574	1.98273	0.499226	0.0398962	0.00932086	0.0100755	0.0122159	0.00574091	0.00201986	0.00246379	0.00112884
		Z. bailii with acetic acid repl 4	0.00548874	0.0315171	0.0347724	0.00566825	0.0299706	0.0200667	0.0844955	0.0996603	0.0563511	0	0.00568896	0.00470858	0	0.00459121	0.00774637	0.00550255	0.00670386	0.012921	0.00727344	0.0140981	0	0.00421149	0.00662101	0.0391634	0.0072838	0	0.0351625	0.450097	0.345787	0.0799699	0.443124	11.0514	6.05373	1.29356	0.0975925	36.1808	17.1677	4.59425	0.966902	0.070104	0.0186583	0.0224762	0.0129451	0.00762555	0.00540589	0	0
Statistics
Yeast	Acetic acid in culturing media (g/L)	Statistics on the replicates	LysoPC14:2	LysoPC14:1	LysoPC14:0	LysoPC16:2	LysoPC16:1	LysoPC16:0	LysoPC18:2	LysoPC18:1	LysoPC18:0	LysoPC20:2	LysoPC20:1	LysoPC20:0	LysoPC22:2	LysoPC22:1	LysoPC22:0	PC28:4	PC28:3	PC28:2	PC28:1	PC28:0	PC30:4	PC30:3	PC30:2	PC30:1	PC30:0	PC32:4	PC32:3	PC32:2	PC32:1	PC32:0	PC34:4	PC34:3	PC34:2	PC34:1	PC34:0	PC36:4	PC36:3	PC36:2	PC36:1	PC36:0	PC38:4	PC38:3	PC38:2	PC38:1	PC38:0	PC40:4	PC40:3
S. cerevisiae	0	Average	0	0.0110562	0.0173885	0.0012325	3.7462	0.24437	0.00125194	5.75068	0.172056	0.000778643	0.00733111	0.00170648	0.000922988	0.000390313	0.000328217	0.000378934	0.000396445	0.011835	1.20511	0.31191	0.00108369	0.00152064	0.590761	2.21879	0.234165	0.000979125	0.0428364	128.039	27.0745	1.13067	0.000936826	0.113314	229.126	39.2688	1.45422	0.0190646	0.0526755	21.3003	6.57906	0.63802	0.0356444	0.0287443	0.313642	0.0406198	0.101435	0.00496446	0.00718837
	9		0.00106942	0.00910685	0.0116401	0.0035893	1.52388	0.148314	0.00143546	2.62472	0.1002	0.00110174	0.00534722	0.0016543	0.00118693	0.00124116	0	0	0	0.00645726	1.57816	0.255005	0.00225449	0.00527659	0.676446	1.96837	0.153463	0.00237727	0.0512978	154.36	26.2449	0.944789	0.00163276	0.12412	222.963	27.5697	0.909075	0.029681	0.0780008	12.0157	2.94946	0.298848	0.0362765	0.021274	0.144711	0.021451	0.0336076	0.00400996	0.0087891
Z. bailii	0		0.000849191	0.00521131	0.009061	0.0308598	1.601	0.230024	8.92129	6.03333	0.361998	0.00552958	0.00782606	0.00526634	0.00184278	0.00100439	0.00123288	0.000740564	0.00104426	0.0118525	0.00689693	0.00552973	0.00164071	0.00151823	0.0165343	0.0417235	0.00452781	0.00624049	0.239477	4.37906	1.28486	0.0809532	1.88604	94.1474	62.3919	8.61299	0.327951	187.099	129.169	36.2926	5.93662	0.298723	0.257757	0.330502	0.179791	0.0701292	0.0246218	0.0249515	0.0149225
	24		0.003438	0.0146232	0.0157043	0.00333816	0.0291506	0.018508	0.0816689	0.0876667	0.0517948	0	0.00335207	0.00317883	0	0.00459121	0.00451054	0.00349961	0.00357968	0.00673223	0.00645704	0.00877414	0	0.00421149	0.0051356	0.0301949	0.00463713	0.00284545	0.0170554	0.376392	0.253583	0.0563312	0.222674	5.99081	4.17035	1.04316	0.0779448	20.9794	11.3838	3.40316	0.902856	0.0720369	0.0156336	0.0170341	0.0154224	0.00800436	0.00413017	0.00333458	0.00252731
S. cerevisiae	0	Median	0	0.0109695	0.0167589	0.00109443	3.92897	0.249186	0.00122955	6.17617	0.18353	0.000940355	0.00791712	0.0011912	0.00114186	0.000390313	0.000328217	0.000436824	0.000396445	0.0117421	1.23804	0.288298	0.00102468	0.000974166	0.600438	2.17496	0.221774	0.000833269	0.0454636	131.717	26.7487	1.07608	0.000870605	0.115179	236.23	39.4727	1.44891	0.0188526	0.0453417	21.4364	6.56109	0.657696	0.030109	0.023246	0.298999	0.0420847	0.107358	0.00538884	0.00588909
	9		0.00106942	0.00942513	0.0119717	0.0034992	1.55228	0.141968	0.00126619	2.62162	0.0977043	0.00110174	0.00530638	0.00142026	0.00113352	0.00124116	0	0	0	0.00615917	1.58459	0.250892	0.00204437	0.00537973	0.682448	1.99095	0.154751	0.0022845	0.0491047	153.957	25.7921	0.929598	0.00164975	0.120181	218.62	26.3563	0.875362	0.031512	0.0891117	12.0331	2.92257	0.289708	0.0419013	0.0220938	0.151828	0.0213759	0.0318071	0.00432974	0.00981673
Z. bailii	0		0.000699622	0.00442678	0.00913011	0.0303488	1.45614	0.194545	8.23697	5.85415	0.329689	0.00545038	0.00745941	0.00524321	0.00152084	0.000859156	0.00105411	0.000740564	0.000878615	0.0110776	0.00716534	0.00566035	0.00145655	0.00142552	0.0159042	0.0424306	0.00431975	0.00612104	0.240884	4.42537	1.31892	0.0783939	1.94826	97.9537	62.1633	8.32639	0.325739	195.707	133.267	36.8528	5.89537	0.295626	0.271256	0.34942	0.181387	0.0666577	0.026186	0.0266706	0.0149645
	24		0.003438	0.00993093	0.0118028	0.00307167	0.0255008	0.0195546	0.0876203	0.0890307	0.0545456	0	0.00306084	0.00293331	0	0.00459121	0.00451054	0.00349961	0.00270658	0.00497062	0.00530461	0.00801402	0	0.00421149	0.00654397	0.0305237	0.00431168	0.00284545	0.01273	0.32235	0.270128	0.0560453	0.160681	4.83405	4.18766	1.17513	0.0881695	17.0633	10.6959	3.51783	0.99776	0.0756439	0.016387	0.0177923	0.0133679	0.00706192	0.00443472	0.00328474	0.00319688
S. cerevisiae	0	Standard deviation	0	0.00148906	0.00285172	0.000365791	1.14445	0.0668917	0.000245882	1.50246	0.0399784	0.000388288	0.00176995	0.00137518	0.000539568	0.000161658	1.77186e-05	0.000112977	0	0.00285424	0.259818	0.0733253	0.000393478	0.00132582	0.1026	0.422625	0.0442284	0.000319889	0.00971445	24.9893	5.01434	0.244859	0.000322592	0.0202121	41.1924	6.93806	0.268235	0.0081087	0.0225683	4.18163	1.18436	0.143212	0.0322517	0.028365	0.071331	0.00791	0.0317452	0.00304862	0.00481828
	9		0	0.00205621	0.00371724	0.000877224	0.317167	0.0270293	0.000301479	0.594121	0.017208	5.04739e-05	0.000633162	0.000630854	0.000239486	0	0	0	0	0.000852292	0.235561	0.0387791	0.000622384	0.0013159	0.110534	0.279568	0.0231722	0.00108784	0.00822826	19.546	3.67563	0.136188	0.00044206	0.0157268	25.0401	3.9811	0.14734	0.017452	0.0321392	1.31594	0.437457	0.0408656	0.0212688	0.0121429	0.0191038	0.00393973	0.00701319	0.00143025	0.00326978
Z. bailii	0		0.00045165	0.00165802	0.00179855	0.00840989	0.400514	0.0844416	2.17629	1.37779	0.0991951	0.00130967	0.00259777	0.00156989	0.0010104	0.000440938	0.000756314	0	0.000507166	0.00585967	0.00253681	0.00204816	0.000498914	0.000471025	0.00272675	0.00700516	0.0014148	0.00318543	0.0260099	0.464559	0.2061	0.0159114	0.392818	11.4537	6.95934	1.56214	0.0727976	39.6822	14.6181	3.9947	0.97784	0.0553684	0.0467188	0.0404801	0.0229008	0.0145036	0.00751484	0.00999583	0.00659413
	24		0.00290018	0.0114758	0.0133571	0.00191713	0.0171716	0.00688565	0.0329956	0.0404614	0.0172587	0	0.00220574	0.00142296	0	0	0.00457616	0.00283259	0.00279196	0.0041992	0.00496118	0.0042762	0	0	0.00250638	0.0129494	0.00231833	0	0.0123595	0.234317	0.109719	0.0197255	0.147919	3.45726	1.58409	0.349967	0.0271224	10.2642	4.23616	1.07921	0.276016	0.0240954	0.00498	0.0055131	0.00491937	0.00287191	0.00171064	0.000896755	0.00121147
S. cerevisiae	0	Variance	0	2.2173e-06	8.13231e-06	1.33803e-07	1.30977	0.0044745	6.0458e-08	2.25739	0.00159827	1.50768e-07	3.13272e-06	1.89112e-06	2.91134e-07	2.61333e-08	3.13949e-10	1.27638e-08	0	8.14669e-06	0.0675054	0.0053766	1.54825e-07	1.7578e-06	0.0105268	0.178612	0.00195615	1.02329e-07	9.43705e-05	624.465	25.1436	0.0599559	1.04066e-07	0.000408529	1696.81	48.1367	0.07195	6.5751e-05	0.000509328	17.486	1.40271	0.0205097	0.00104017	0.000804573	0.00508811	6.25681e-05	0.00100776	9.29408e-06	2.32158e-05
	9		0	4.228e-06	1.38179e-05	7.69522e-07	0.100595	0.000730583	9.08896e-08	0.35298	0.000296115	2.54761e-09	4.00894e-07	3.97977e-07	5.73535e-08	0	0	0	0	7.26402e-07	0.055489	0.00150382	3.87362e-07	1.73159e-06	0.0122178	0.0781583	0.000536951	1.1834e-06	6.77043e-05	382.046	13.5103	0.0185472	1.95417e-07	0.000247332	627.007	15.8492	0.0217091	0.000304572	0.00103293	1.7317	0.191369	0.00167	0.000452362	0.00014745	0.000364955	1.55215e-05	4.91848e-05	2.04562e-06	1.06915e-05
Z. bailii	0		2.03988e-07	2.74903e-06	3.23478e-06	7.07262e-05	0.160411	0.00713038	4.73624	1.89831	0.00983967	1.71524e-06	6.74841e-06	2.46455e-06	1.02091e-06	1.94426e-07	5.72011e-07	0	2.57217e-07	3.43357e-05	6.4354e-06	4.19496e-06	2.48915e-07	2.21865e-07	7.43517e-06	4.90723e-05	2.00166e-06	1.0147e-05	0.000676515	0.215815	0.0424772	0.000253173	0.154306	131.187	48.4324	2.44028	0.00529949	1574.68	213.689	15.9576	0.956171	0.00306566	0.00218265	0.00163864	0.000524447	0.000210354	5.64728e-05	9.99166e-05	4.34826e-05
	24		8.41104e-06	0.000131694	0.000178412	3.67539e-06	0.000294864	4.74122e-05	0.00108871	0.00163712	0.000297863	0	4.86529e-06	2.02482e-06	0	0	2.09412e-05	8.02357e-06	7.79504e-06	1.76333e-05	2.46133e-05	1.82859e-05	0	0	6.28194e-06	0.000167687	5.37465e-06	0	0.000152757	0.0549045	0.0120383	0.000389095	0.02188	11.9526	2.50934	0.122477	0.000735625	105.354	17.9451	1.16469	0.0761848	0.000580588	2.48004e-05	3.03943e-05	2.42002e-05	8.24787e-06	2.92629e-06	8.0417e-07	1.46766e-06
All data are expressed as apparent quantities and calculated relative to the appropriate internal standard. See Materials and Methods for more information.
[truncated: 13 more columns]

## Sheet: PE
Phosphatidylethanolamine (PE)
Raw data
Yeast	Acetic acid in culturing media (g/L)	Biological replicates	LysoPE14:2	LysoPE14:1	LysoPE14:0	LysoPE16:2	LysoPE16:1	LysoPE16:0	LysoPE18:2	LysoPE18:1	LysoPE18:0	LysoPE20:2	LysoPE20:1	LysoPE20:0	LysoPE22:2	LysoPE22:1	LysoPE22:0	PE28:4	PE28:3	PE28:2	PE28:1	PE28:0	PE30:4	PE30:3	PE30:2	PE30:1	PE30:0	PE32:4	PE32:3	PE32:2	PE32:1	PE32:0	PE34:4	PE34:3	PE34:2	PE34:1	PE34:0	PE36:4	PE36:3	PE36:2	PE36:1	PE36:0	PE38:4	PE38:3	PE38:2	PE38:1	PE38:0	PE40:4	PE40:3
S. cerevisiae	0	S. cerevisiae repl 1	0.00176769	0.0104354	0.0496102	0.00206377	4.93657	1.08221	0.00311317	2.35614	0.0637255	0.00316486	0.00244306	0.00134548	0.00312456	0.00193325	0.000704275	0.000886475	0.00138227	0.0026349	0.254782	0.110935	0.00166258	0.00283549	0.0471093	0.491555	0.0403337	0.001928	0.0107805	21.0305	11.3175	0.551366	0.026208	0.0387158	78.9411	32.3806	1.59947	0.0660625	0.0174702	3.75738	0.676923	0.0405816	0.00266556	0.00300105	0.007959	0.000965312	0.00159075	0.00147249	0.000621934
		S. cerevisiae repl 2	0.000799129	0.0190069	0.133027	0.00538982	14.0222	2.84057	0.00276681	5.18878	0.140829	0.00162151	0.00194788	0.000520123	0.00124692	0.000658765	0.000539929	0.000824963	0.000602791	0.00422987	0.439891	0.180218	0.00178771	0.00140795	0.0716039	0.779054	0.0658842	0.00385959	0.0170857	32.6307	17.0574	0.832343	0.0484851	0.0588101	112.318	44.2701	2.26043	0.0968247	0.0392478	4.90947	0.922032	0.0562043	0.0241642	0.0222413	0.0137101	0.00182043	0.00287015	0.00197285	0.00371922
		S. cerevisiae repl 3	0.000805012	0.0203204	0.140066	0.00190306	14.1735	2.66799	0.00249852	6.32148	0.158753	0.000881679	0.00168754	0.00149247	0.0033129	0.00135191	0.00101713	0.000571601	0.000880828	0.00523641	0.386771	0.142454	0.00170543	0.000799901	0.0706468	0.637763	0.0509798	0.00188177	0.0146333	27.5766	12.865	0.613404	0.0346257	0.0479847	93.4085	33.2763	1.66641	0.0726333	0.0199992	4.73848	0.912249	0.0510079	0.0119201	0.00702532	0.010282	0.00208025	0.00359146	0.00159554	0.00189795
		S. cerevisiae repl 4	0.000824092	0.0217228	0.167207	0.00751869	17.5647	3.17871	0.00365519	7.46545	0.201513	0.00185191	0.00264756	0.000693779	0.00152246	0.000950734	0.000600174	0.00150319	0.00135636	0.00480047	0.429267	0.157045	0.002453	0.000892002	0.0854606	0.667731	0.0558355	0.00339915	0.0209648	31.811	13.9917	0.674479	0.0375393	0.0568073	105.151	36.7357	1.74653	0.0838307	0.0310457	4.89577	0.859991	0.0548269	0.0123825	0.00853367	0.0119851	0.00250072	0.00502715	0.00141876	0.00201802
	9	S. cerevisiae with acetic acid repl 1	0.00148628	1.02826	0.0339101	0.00384756	2.82376	0.396306	0.00183232	2.48605	0.0648308	0.0105945	0.0112088	0.0060503	0.00306402	0.00110976	0.0011814	0.0024253	0.00204573	0.00332317	0.515224	0.0682409	0.00268293	0.00172256	0.0751646	0.376139	0.0289405	0.00255488	0.0119162	30.9186	6.50388	0.267741	0.0194482	0.0304741	97.8814	13.8207	0.479155	0.0368933	0.00779573	2.75352	0.312343	0.0188125	0.00483537	0.00225	0.00468598	0.00118902	0.00132927	0.00117226	0.00293445
		S. cerevisiae with acetic acid repl 2	0.00270408	1.888	0.0623976	0.00871492	6.00936	0.633603	0.00357145	4.30222	0.101408	0.0146077	0.0164999	0.0081623	0.00608238	0.00301884	0.00196725	0.00128765	0.00113385	0.00702308	0.736954	0.107544	0.00446566	0.00162745	0.109617	0.496919	0.0433457	0.00335506	0.0223766	39.4988	8.43321	0.359907	0.0252434	0.0496051	117.474	16.1277	0.542861	0.0423746	0.0447102	3.31246	0.375131	0.0269424	0.021815	0.0105534	0.00829464	0.00256994	0.00283821	0.00190108	0.00175622
		S. cerevisiae with acetic acid repl 3	0.00386268	1.15025	0.047383	0.00753091	3.57225	0.378764	0.00390799	2.80895	0.0778861	0.0143274	0.0198722	0.00360592	0.00458386	0.0032812	0.00249016	0.00259966	0.00226173	0.00616405	0.642915	0.0924929	0.00387401	0.00313961	0.0958458	0.411634	0.0299386	0.0021088	0.0162399	33.4499	7.21572	0.341879	0.0226833	0.0406695	107.277	14.1371	0.473514	0.0450099	0.0476869	2.77859	0.313179	0.0195871	0.0211069	0.0103684	0.00951322	0.00371731	0.00147635	0.00576948	0.00386079
		S. cerevisiae with acetic acid repl 4	0.00204776	3.19388	0.0861002	0.0034208	7.0309	0.753942	0.00511602	4.8776	0.12573	0.0229065	0.0339786	0.0111429	0.00880501	0.00253692	0.00367888	0.00266175	0.00291139	0.00709462	0.723232	0.100166	0.00508059	0.00219451	0.112863	0.457184	0.0361157	0.002068	0.0121735	35.5082	7.11875	0.325224	0.0216364	0.0388601	100.792	13.547	0.43041	0.0464827	0.0383895	2.58496	0.279635	0.0238309	0.0252832	0.0144136	0.00591724	0.00164968	0.00152654	0.00177787	0.00431817
Z. bailii	0	Z. bailii repl 1	0.0029941	1.23806	0.0304038	0.0208467	4.50787	0.218935	7.2868	6.48853	0.155296	0.0100758	0.0129389	0.00767648	0.00567548	0.00146113	0.00210559	0.000962465	0.00169884	0.00632205	0.00588466	0.00364067	0.0019767	0.00195134	0.00151712	0.0122638	0.00312405	0.00172737	0.0392075	1.53285	0.253736	0.0193254	0.175486	24.0942	45.0497	3.97994	0.0989363	23.592	28.898	5.10237	0.365817	0.0153519	0.0085016	0.00411504	0.00371252	0.00133752	0.00190274	0.00410764	0.00231795
		Z. bailii repl 2	0.000644613	1.24297	0.0236593	0.011741	2.69364	0.14597	4.65626	5.49135	0.132741	0.0129084	0.012715	0.00475402	0.003773	0.000850083	0.00125095	0.000866199	0.000864184	0.00309414	0.00288867	0.00329458	0.00102937	0.000805766	0.00093066	0.0119979	0.00228032	0.00275169	0.032563	1.29905	0.217347	0.0198923	0.105449	15.0129	32.1887	2.99056	0.0763272	14.016	18.4887	3.84408	0.313454	0.0127492	0.00481647	0.00454452	0.00396437	0.00177269	0.00121268	0.00296119	0.0012016
		Z. bailii repl 3	0.00205279	0.88116	0.020029	0.0276919	5.85125	0.32224	11.3586	10.3883	0.234566	0.0175033	0.0153323	0.00894913	0.00537753	0.00128624	0.00221909	0.00154479	0.00159936	0.00512418	0.00449925	0.00503713	0.00252961	0.00140317	0.00163963	0.0156311	0.00434594	0.00240358	0.0390875	1.61082	0.274089	0.0289119	0.174894	21.7257	41.5896	3.85828	0.0955184	24.5905	29.9413	5.22452	0.38508	0.0189363	0.0225027	0.0139863	0.00541651	0.00343518	0.00171239	0.00680799	0.00425889
		Z. bailii repl 4	0.00212804	1.90154	0.0299082	0.011117	1.69219	0.129496	3.65376	4.855	0.123114	0.0178585	0.022862	0.00936994	0.00587969	0.00196515	0.00251949	0.00393031	0.00293328	0.00635259	0.00907964	0.00370568	0.0030607	0.00181277	0.00165514	0.0150579	0.00447939	0.0016604	0.0279693	1.31012	0.296491	0.0395119	0.0978491	16.0341	35.7892	3.50085	0.0885764	16.3283	22.2406	4.42576	0.36264	0.0159839	0.0232744	0.0123834	0.0042771	0.00373458	0.00197303	0.00368466	0.00250767
	24	Z. bailii with acetic acid repl 1	0.00760567	1.95859	0.0349654	0.00253994	0.0709816	0.019344	0.128717	0.309236	0.0420385	0.0258046	0.0293012	0.0153527	0.00498563	0.00222892	0.00342821	0.00340229	0.00445314	0.00413034	0.00889213	0.0045144	0.00217709	0	0.003063	0.0253711	0.00408793	0.00259648	0.00439423	0.138174	0.169478	0.0689506	0.015593	1.98305	5.19078	0.69247	0.0341643	2.21738	4.33035	0.902208	0.142882	0.00989586	0.00398426	0.00240799	0	0.00170115	0.00209227	0.00355308	0.00203572
		Z. bailii with acetic acid repl 2	0.00832663	3.36122	0.0464936	0.0163783	0.146515	0.0362426	0.178685	0.482315	0.0565377	0.057473	0.0530178	0.0209413	0.0136179	0.00955663	0.00488034	0.00467912	0.00476415	0.00891329	0.0133062	0.0101745	0.00854202	0.0043532	0.00510707	0.0467175	0.0107611	0.00515525	0.0131276	0.308247	0.252225	0.11307	0.0162678	2.1195	5.76915	0.810542	0.0439033	2.4829	4.65278	0.974025	0.167689	0.0211623	0.00778814	0.00409813	0.00717598	0.00357098	0.00467629	0.00848534	0.0105882
		Z. bailii with acetic acid repl 3	0.00602629	2.24973	0.0400675	0.0118592	0.0580925	0.0228828	0.0631944	0.180356	0.0266118	0.0223422	0.0356583	0.0144878	0.0068317	0.00318358	0.0040207	0.00186132	0.00224183	0.00555066	0.00709647	0.00549517	0.00318041	0.00267148	0.00217841	0.0170753	0.00802872	0.00298064	0.00406034	0.129485	0.1484	0.0609907	0.0161573	1.35007	3.02133	0.380097	0.023054	1.38964	2.24589	0.427363	0.0721126	0.00857411	0.00417924	0.00398265	0.0020373	0.00209755	0.00122555	0.00213719	0.00323115
		Z. bailii with acetic acid repl 4	0.0195834	12.8869	0.208413	0.0469719	0.149825	0.0578147	0.195057	0.539712	0.109592	0.126244	0.122786	0.0478659	0.040054	0.0208434	0.0239606	0.013097	0.0127794	0.0253172	0.0265255	0.0430814	0.0174397	0.00697657	0.00774637	0.0535238	0.035594	0.0164352	0.0184097	0.339536	0.459874	0.203211	0.0574868	4.54157	7.76929	0.895369	0.0498164	4.42582	6.32081	1.00056	0.151144	0.0213819	0.0115747	0.0122478	0.00967951	0.00924456	0.00740117	0.00887174	0.00758067
Statistics
Yeast	Acetic acid in culturing media (g/L)	Statistics on the replicates	LysoPE14:2	LysoPE14:1	LysoPE14:0	LysoPE16:2	LysoPE16:1	LysoPE16:0	LysoPE18:2	LysoPE18:1	LysoPE18:0	LysoPE20:2	LysoPE20:1	LysoPE20:0	LysoPE22:2	LysoPE22:1	LysoPE22:0	PE28:4	PE28:3	PE28:2	PE28:1	PE28:0	PE30:4	PE30:3	PE30:2	PE30:1	PE30:0	PE32:4	PE32:3	PE32:2	PE32:1	PE32:0	PE34:4	PE34:3	PE34:2	PE34:1	PE34:0	PE36:4	PE36:3	PE36:2	PE36:1	PE36:0	PE38:4	PE38:3	PE38:2	PE38:1	PE38:0	PE40:4	PE40:3
S. cerevisiae	0	Average	0.00104898	0.0178714	0.122478	0.00421884	12.6743	2.44237	0.00300842	5.33296	0.141205	0.00187999	0.00218151	0.00101296	0.00230171	0.00122366	0.000715376	0.000946557	0.00105556	0.00422541	0.377678	0.147663	0.00190218	0.00148384	0.0687051	0.644026	0.0532583	0.00276713	0.0158661	28.2622	13.8079	0.667898	0.0367145	0.0505795	97.4546	36.6657	1.81821	0.0798378	0.0269407	4.57527	0.842799	0.0506552	0.0127831	0.0102003	0.010984	0.00184168	0.00326988	0.00161491	0.00206428
	9		0.0025252	1.8151	0.0574477	0.00587855	4.85907	0.540654	0.00360694	3.61871	0.0924636	0.015609	0.0203899	0.00724036	0.00563382	0.00248668	0.00232942	0.00224359	0.00208817	0.00590123	0.654581	0.0921111	0.0040258	0.00217103	0.0983725	0.435469	0.0345851	0.00252168	0.0156765	34.8439	7.31789	0.323688	0.0222528	0.0399022	105.856	14.4081	0.481485	0.0426901	0.0346456	2.85738	0.320072	0.0222932	0.0182601	0.00939636	0.00710277	0.00228149	0.00179259	0.00265517	0.00321741
Z. bailii	0		0.00195489	1.31593	0.0260001	0.0178492	3.68624	0.20416	6.73886	6.80579	0.161429	0.0145865	0.015962	0.00768739	0.00517643	0.00139065	0.00202378	0.00182594	0.00177392	0.00522324	0.00558806	0.00391952	0.00214909	0.00149326	0.00143564	0.0137376	0.00355742	0.00213576	0.0347068	1.43821	0.260416	0.0269104	0.138419	19.2167	38.6543	3.58241	0.0898396	19.6317	24.8922	4.64918	0.356748	0.0157554	0.0147738	0.00875729	0.00434262	0.00256999	0.00170021	0.00439037	0.00257153
	24		0.0103855	5.11411	0.0824849	0.0194373	0.106354	0.0340711	0.141413	0.377905	0.058695	0.0579661	0.0601907	0.0246619	0.0163723	0.00895313	0.00907246	0.00575994	0.00605964	0.0109779	0.0139551	0.0158164	0.0078348	0.00466708	0.00452371	0.0356719	0.0146179	0.00679188	0.00999798	0.22886	0.257494	0.111556	0.0263762	2.49855	5.43764	0.69462	0.0377345	2.62894	4.38746	0.826038	0.133457	0.0152536	0.00688158	0.00568415	0.0062976	0.00415356	0.00384882	0.00576184	0.00585895
S. cerevisiae	0	Median	0.000814552	0.0196636	0.136546	0.00372679	14.0979	2.75428	0.00293999	5.75513	0.149791	0.00173671	0.00219547	0.00101963	0.00232351	0.00115132	0.000652224	0.000855719	0.00111859	0.00451517	0.408019	0.149749	0.00174657	0.00114998	0.0711253	0.652747	0.0534076	0.00266357	0.0158595	29.6938	13.4283	0.643942	0.0360825	0.052396	99.2797	35.006	1.70647	0.078232	0.0255225	4.81712	0.88612	0.0529174	0.0121513	0.0077795	0.0111336	0.00195034	0.0032308	0.00153402	0.00195798
	9		0.00237592	1.51913	0.0548903	0.00568923	4.79081	0.514955	0.00373972	3.55559	0.0896471	0.0144676	0.018186	0.0071063	0.00533312	0.00277788	0.00222871	0.00251248	0.00215373	0.00659357	0.683074	0.0963296	0.00416983	0.00195853	0.102731	0.434409	0.0330272	0.00233184	0.0142067	34.4791	7.16724	0.333552	0.0221599	0.0397648	104.035	13.9789	0.476335	0.0436922	0.0415499	2.76606	0.312761	0.021709	0.021461	0.0104609	0.00710594	0.00210981	0.00150145	0.00183948	0.00339762
Z. bailii	0		0.00209041	1.24052	0.0267837	0.0162939	3.60075	0.182452	5.97153	5.98994	0.144018	0.0152058	0.0141356	0.0083128	0.00552651	0.00137369	0.00216234	0.00125363	0.0016491	0.00572312	0.00519196	0.00367318	0.00225315	0.00160797	0.00157838	0.0136608	0.00373499	0.00206547	0.0358252	1.42149	0.263912	0.0244021	0.140171	18.8799	38.6894	3.67956	0.0920474	19.9602	25.5693	4.76406	0.364229	0.0156679	0.0155022	0.00846394	0.00412073	0.00260393	0.00180757	0.00389615	0.00241281
	24		0.00796615	2.80548	0.0432806	0.0141188	0.108748	0.0295627	0.153701	0.395776	0.0492881	0.0416388	0.0443381	0.018147	0.0102248	0.00637011	0.00445052	0.00404071	0.00460864	0.00723197	0.0110991	0.00783482	0.00586122	0.0043532	0.00408504	0.0360443	0.00939492	0.00406795	0.00876092	0.223211	0.210852	0.0910102	0.0162126	2.05128	5.47996	0.751506	0.0390338	2.35014	4.49156	0.938117	0.147013	0.0155291	0.00598369	0.00404039	0.00717598	0.00283427	0.00338428	0.00601921	0.00540591
S. cerevisiae	0	Standard deviation	0.00047926	0.00507986	0.0507643	0.00272442	5.4115	0.931255	0.000499218	2.19142	0.0575851	0.000951333	0.000441285	0.000477933	0.00106762	0.000551834	0.000212312	0.000395316	0.000379802	0.00113762	0.0850843	0.0290056	0.000370868	0.000939995	0.0159091	0.118436	0.010619	0.0010134	0.00427658	5.30554	2.42789	0.120602	0.00920105	0.00920158	14.5975	5.40625	0.300881	0.0134927	0.0101026	0.550757	0.113888	0.00706627	0.00880907	0.00836007	0.00245473	0.000648005	0.00143418	0.000249835	0.00127135
	9		0.00102114	0.994566	0.0223666	0.00264201	1.98649	0.183645	0.00135628	1.15335	0.0268496	0.00519757	0.00973558	0.00319923	0.00244703	0.000968314	0.00104817	0.000645103	0.000734923	0.00176995	0.101743	0.0170587	0.00102183	0.000691688	0.0171405	0.0527124	0.00664684	0.000597749	0.00488602	3.62678	0.807598	0.0398964	0.00240659	0.00784667	8.68383	1.17146	0.0463488	0.00422168	0.0183149	0.315333	0.0398913	0.00380427	0.00913399	0.0051162	0.00219676	0.00111616	0.000702085	0.0021005	0.00113148
Z. bailii	0		0.000972343	0.425579	0.00502654	0.00792665	1.85507	0.0877913	3.43983	2.48115	0.0505891	0.00375837	0.00475004	0.00208389	0.000958069	0.000461207	0.000544008	0.00143458	0.000857874	0.00153033	0.00263004	0.000766615	0.000867818	0.000514034	0.000342267	0.00187326	0.00104731	0.000530364	0.00546006	0.157612	0.0336051	0.00947962	0.0425727	4.39262	5.75991	0.443872	0.00998633	5.2511	5.46429	0.641481	0.0305179	0.00254103	0.00949538	0.00515714	0.000752249	0.00119157	0.000343166	0.00167982	0.00126389
	24		0.00620673	5.217	0.0840846	0.0192394	0.0485903	0.0174216	0.059291	0.164138	0.0360644	0.0481858	0.0429168	0.0157315	0.0162182	0.00856826	0.00994331	0.00502523	0.00461846	0.00976769	0.00877704	0.0183437	0.00698635	0.00216964	0.00247386	0.0172495	0.0142498	0.00652682	0.00700499	0.11053	0.142166	0.065256	0.0207425	1.40266	1.95329	0.225586	0.011723	1.28521	1.6731	0.269011	0.0421767	0.00697114	0.00358442	0.00444318	0.00389609	0.00348803	0.00278513	0.0034208	0.00395192
S. cerevisiae	0	Variance	2.2969e-07	2.5805e-05	0.00257701	7.42246e-06	29.2843	0.867236	2.49219e-07	4.80232	0.00331604	9.05034e-07	1.94732e-07	2.2842e-07	1.13981e-06	3.04521e-07	4.50764e-08	1.56275e-07	1.4425e-07	1.29418e-06	0.00723934	0.000841325	1.37543e-07	8.83591e-07	0.000253099	0.0140271	0.000112763	1.02698e-06	1.82891e-05	28.1488	5.89465	0.0145448	8.46593e-05	8.46691e-05	213.087	29.2275	0.0905294	0.000182053	0.000102063	0.303333	0.0129705	4.99322e-05	7.75997e-05	6.98908e-05	6.0257e-06	4.1991e-07	2.05687e-06	6.24175e-08	1.61633e-06
	9		1.04273e-06	0.989162	0.000500265	6.98022e-06	3.94614	0.0337255	1.8395e-06	1.33022	0.000720901	2.70147e-05	9.47815e-05	1.02351e-05	5.98796e-06	9.37632e-07	1.09866e-06	4.16158e-07	5.40112e-07	3.13272e-06	0.0103516	0.000290999	1.04414e-06	4.78432e-07	0.000293797	0.0027786	4.41805e-05	3.57304e-07	2.38732e-05	13.1535	0.652215	0.00159172	5.79168e-06	6.15702e-05	75.4089	1.37232	0.00214821	1.78226e-05	0.000335436	0.0994349	0.00159132	1.44725e-05	8.34298e-05	2.61755e-05	4.82575e-06	1.24581e-06	4.92923e-07	4.4121e-06	1.28025e-06
Z. bailii	0		9.45451e-07	0.181117	2.52661e-05	6.28318e-05	3.44128	0.00770731	11.8324	6.15611	0.00255926	1.41253e-05	2.25629e-05	4.3426e-06	9.17896e-07	2.12712e-07	2.95945e-07	2.05802e-06	7.35948e-07	2.34191e-06	6.91711e-06	5.87699e-07	7.53108e-07	2.64231e-07	1.17147e-07	3.5091e-06	1.09686e-06	2.81286e-07	2.98123e-05	0.0248415	0.0011293	8.98632e-05	0.00181243	19.2951	33.1766	0.197022	9.97268e-05	27.5741	29.8585	0.411498	0.000931342	6.45683e-06	9.01622e-05	2.65961e-05	5.65879e-07	1.41984e-06	1.17763e-07	2.8218e-06	1.59742e-06
	24		3.85235e-05	27.2171	0.00707022	0.000370155	0.00236102	0.000303512	0.00351542	0.0269413	0.00130064	0.00232187	0.00184185	0.00024748	0.00026303	7.34151e-05	9.88694e-05	2.52529e-05	2.13302e-05	9.54078e-05	7.70364e-05	0.000336491	4.88091e-05	4.70734e-06	6.11998e-06	0.000297545	0.000203057	4.25994e-05	4.90699e-05	0.0122169	0.0202112	0.00425835	0.000430251	1.96746	3.81534	0.050889	0.000137429	1.65176	2.79926	0.0723669	0.00177887	4.85968e-05	1.28481e-05	1.97418e-05	1.51795e-05	1.21664e-05	7.75695e-06	1.17019e-05	1.56177e-05
All data are expressed as apperent quantities and calculated relative to the appropriate internal standard. See Materials and Methods for more information.
[truncated: 13 more columns]

## Sheet: PI
Phosphatidylinositol (PI)
Raw data
Yeast	Acetic acid in culturing media (g/L)	Biological replicates	LysoPI14:2	LysoPI14:1	LysoPI14:0	LysoPI16:2	LysoPI16:1	LysoPI16:0	LysoPI18:2	LysoPI18:1	LysoPI18:0	LysoPI20:2	LysoPI20:1	LysoPI20:0	LysoPI22:2	LysoPI22:1	LysoPI22:0	PI28:4	PI28:3	PI28:2	PI28:1	PI28:0	PI30:4	PI30:3	PI30:2	PI30:1	PI30:0	PI32:4	PI32:3	PI32:2	PI32:1	PI32:0	PI34:4	PI34:3	PI34:2	PI34:1	PI34:0	PI36:4	PI36:3	PI36:2	PI36:1	PI36:0	PI38:4	PI38:3	PI38:2	PI38:1	PI38:0	PI40:4	PI40:3
S. cerevisiae	0	S. cerevisiae repl 1	0.00401016	0.0222574	0.0216328	0.00904345	2.07413	1.83714	0.00369744	7.64214	1.37243	0.00232481	0.00216013	0.011116	0.0600674	0.0657595	0.042585	0.000767344	0.00994043	0.00223196	0.368203	2.66453	0.00273038	0	0.0320611	0.812664	0.726098	0.00136826	0.00397337	7.33784	25.9171	1.51253	0.00246671	0.00396724	20.9673	105.86	5.60343	0.00283725	0.00774527	2.51103	28.4259	1.85261	0.00768833	0.080099	0.30053	0.122366	0.299241	0.00161878	0.177327
		S. cerevisiae repl 2	0.00102991	0.0462109	0.033783	0.00111861	3.4445	3.0196	0.00218641	11.3892	1.63543	0.00146048	0.00563179	0.0370906	0.0952333	0.0801618	0.111464	0.00107039	0.0114961	0.00468627	0.445186	3.64602	0.000931743	0	0.071932	1.24292	1.20194	0.0011763	0.0042669	12.0521	43.7616	2.37261	0.00347208	0.00765459	32.5679	186.165	9.74183	0.00892304	0.00587119	4.36571	52.5887	3.76178	0.0118612	0.102525	0.399449	0.293243	0.836249	0.00486022	0.212752
		S. cerevisiae repl 3	0.00171395	0.0479191	0.0277333	0.00206151	2.65892	2.3952	0.00310079	9.65204	1.50728	0.00289975	0.00251981	0.0439494	0.0576917	0.0482717	0.142665	0.000768382	0.00830227	0.0039288	0.351414	2.66879	0.000400376	0.000647417	0.0657639	0.927394	0.907287	0.000971125	0.00291338	8.68409	33.9916	1.90441	0.0033836	0.00562912	26.5289	154.622	7.89712	0.0055729	0.00666839	4.14999	47.9035	3.48578	0.0152399	0.0652562	0.217404	0.293719	1.14917	0.00279411	0.169761
		S. cerevisiae repl 4	0.00218687	0.0473495	0.0535798	0.0115199	4.72289	3.79082	0.00293571	19.6561	2.60196	0.00442789	0.00966152	0.0234453	0.113832	0.119743	0.0773867	0.00121778	0.0212282	0.00941649	0.543563	3.98515	0.00218228	0.000943393	0.0922322	1.14105	1.08653	0.00114529	0.00531438	10.8289	36.7265	1.97057	0.00195928	0.0098735	28.7948	141.635	7.59439	0.00436365	0.011373	4.0933	41.965	2.71966	0.0032202	0.128447	0.313634	0.167715	0.328948	0.00732873	0.233537
	9	S. cerevisiae with acetic acid repl 1	0.00817683	0.0049878	0.00925457	0.00507165	0.359373	1.57008	0.00825762	1.47121	1.30543	0.00470579	0.00448781	0.00459299	0.00678811	0.0218994	0.00997713	0.00472713	0.0282165	0.00325152	0.237788	2.92442	0.000612805	0.000833841	0.0390381	0.846245	1.06202	0.000800305	0.000713415	7.92543	51.2704	2.69907	0.00108384	0.0101387	24.2161	201.472	10.1473	0.00429268	0.00718445	2.2188	50.5815	3.06054	0.00245274	0.025718	0.14282	0.131683	0.262509	0.00425915	0.0945198
		S. cerevisiae with acetic acid repl 2	0.00128408	0.00323881	0.00528654	0.00205667	0.613754	1.74166	0.00105516	2.49647	1.38516	0.0013431	0.00200302	0.00245727	0.00293478	0.0152694	0.0050612	0.00162745	0.0468456	0.00308501	0.311959	3.68154	0	0.00110166	0.0524004	1.12413	1.39839	0.000915666	0.00163103	10.6615	69.1244	3.2883	0.00200302	0.00912983	30.5717	248.726	12.8303	0.00843056	0.00767764	2.35128	54.2746	3.34493	0.00195115	0.035584	0.172437	0.123182	0.0907063	0.00174191	0.110853
		S. cerevisiae with acetic acid repl 3	0.000777822	0.00556936	0.00684182	0.00248828	0.546256	1.47002	0.0014537	2.19312	1.23081	0.00132532	0.000709857	0.00374185	0.00487272	0.0118127	0.00896572	0.000755167	0.0380661	0.00215789	0.24445	3.3128	0.000641892	0.000551272	0.0400012	0.941473	1.10224	0.000872218	0.00100248	9.75557	64.7464	3.25774	0.00097039	0.00826531	29.5864	232.247	11.8811	0.0040628	0.00583933	2.51278	57.0528	3.53637	0.00408357	0.0254699	0.134622	0.141105	0.385753	0.00724961	0.0982473
		S. cerevisiae with acetic acid repl 4	0.0007658	0.00583965	0.00592736	0.00202751	0.396519	1.23106	0.000880501	1.84639	1.03581	0.000708449	0.000782668	0.00360972	0.00237499	0.0125632	0.00926719	0.0039572	0.043266	0.00185546	0.29209	2.88272	0.000661219	0.00175088	0.0382394	0.909285	1.04496	0.000360972	0.00110653	9.29231	59.1205	2.65156	0.00117906	0.0115241	27.5158	217.071	10.572	0.00315091	0.00676401	2.14119	49.9376	3.28226	0.00131738	0.0247485	0.103508	0.146551	0.336618	0.00527289	0.082224
Z. bailii	0	Z. bailii repl 1	0.00249861	0.00514301	0.0122796	0.0027659	0.323681	6.08441	7.73557	11.9449	7.11703	0.00169039	0.00116848	0.0104783	0.00340191	0.109835	0.0518611	0.00102902	0.00179076	0.00234013	0.0079575	0.00268877	0	0.000693059	0.00106917	0.00367976	0.00455348	0	0.00137872	0.145344	2.21159	0.135109	0.0115316	2.23948	76.2955	166.003	7.89582	1.89159	4.77537	78.5636	101.81	6.27687	0.00166926	0.00439712	0.0378668	0.103138	0.116192	0.0099342	0.151041
		Z. bailii repl 2	0.000552957	0.00200031	0.00812313	0.0035776	0.241624	3.8302	5.82085	10.0298	4.48098	0.00119858	0.000569072	0.00618828	0.00306393	0.052537	0.0200998	0.00058418	0.000803752	0.00113512	0.000759435	0.000612382	0	0.000413962	0.000525762	0.00586598	0.00120865	0	0.00160952	0.127967	2.24839	0.129393	0.00538957	1.69733	62.7463	138.926	6.78729	1.31933	4.16514	60.6554	98.1802	5.64688	0.00116735	0.00127512	0.0263757	0.0703152	0.0469721	0.00840716	0.0915532
		Z. bailii repl 3	0.00200862	0.00570754	0.00688075	0.00468894	0.265949	5.49411	7.76522	13.8457	6.77724	0.00180594	0.00125636	0.00971957	0.00301033	0.0919507	0.07534	0.0020346	0.00270501	0.001689	0.00129144	0.00293627	0.000428747	0.000688594	0.000675602	0.0153037	0.000992615	0.000776942	0.00134471	0.12901	2.29821	0.179491	0.00875164	1.96618	75.7879	165.409	8.39766	1.84494	4.77489	81.1479	125.544	6.92752	0.00532426	0.00510339	0.0404984	0.179571	0.376403	0.0129417	0.217757
		Z. bailii repl 4	0.00153166	0.00272179	0.0106586	0.00319206	0.338056	4.39926	7.12983	13.1077	5.50929	0.00155268	0.00140818	0.0142211	0.00349944	0.0695133	0.0595825	0.000853843	0.00251687	0.00163412	0.000617394	0.00101673	0.000593749	0.00040459	0.000738246	0.00617657	0.00256153	0.00116385	0.00109029	0.173433	3.12692	0.234258	0.00855419	2.46452	87.1538	191.87	10.2231	2.01899	5.44572	88.4362	141.523	8.07251	0.00416413	0.00744026	0.040924	0.22135	0.383376	0.010606	0.199936
	24	Z. bailii with acetic acid repl 1	0.00108854	0.00258942	0.0129235	0.00135243	0.0878705	7.58117	1.50893	3.79665	24.2294	0.0016446	0.00186608	0.0129942	0.00238443	0.0560247	0.0275388	0.00118986	0.00184958	0.00132887	0.00278026	0.00291692	0.000730409	0.00143726	0.000805806	0.00937044	0.0026012	0.000777532	0.000680929	0.038542	1.3775	0.317966	0.00163517	0.55373	59.1773	179.82	10.4771	0.606522	2.11358	82.8571	167.717	8.97387	0.0021818	0.00122285	0.0254983	0.178514	0.360442	0.00955186	0.102983
		Z. bailii with acetic acid repl 2	0.00336693	0.00595164	0.0317591	0.00155309	0.0729898	6.4854	1.34182	3.64373	22.5426	0.00216243	0.00158994	0.0125438	0.00177416	0.042866	0.0254135	0.000853068	0.00125835	0.00346896	0.00233248	0.015735	0	0.000782215	0.000629173	0.0164804	0.00787317	0.000561155	0.000844566	0.0957392	2.0396	0.377033	0.00381472	0.547789	68.4793	203.723	11.881	0.674624	2.48401	98.5657	191.541	11.8115	0.00235231	0.0018025	0.0226757	0.118134	0.199031	0.0124588	0.130142
		Z. bailii with acetic acid repl 3	0.00105591	0.00346579	0.00890705	0.000892608	0.0229985	3.03727	0.502911	1.32307	10.5422	0.00114469	0.00145227	0.00754991	0.00123031	0.0106241	0.0071916	0.000481977	0.000481977	0.000681743	0.00107493	0.00112567	0.000537467	0.000979808	0.000632594	0.00712977	0.00119226	0.000761016	0.000548565	0.0208027	0.802195	0.202067	0.0010242	0.261246	31.47	93.4249	5.29416	0.34301	1.22193	52.8991	98.1371	5.74768	0.001939	0.00117957	0.0150729	0.0797782	0.166729	0.00787017	0.0581226
		Z. bailii with acetic acid repl 4	0.00162936	0.00772911	0.0299257	0.00136701	0.0829732	6.9506	1.39128	3.18835	25.6439	0.00359702	0.00450491	0.0105494	0.0016052	0.041597	0.0235912	0.00896839	0.00133594	0.00164317	0.00212991	0.0016052	0.0013601	0.00274782	0.00298946	0.0213957	0.00391806	0.00096657	0.00171911	0.0619744	2.28619	0.368243	0.00331396	0.716947	78.3916	220.849	12.8763	0.848297	2.62748	143.743	236.147	13.553	0.00538863	0.00670731	0.0601828	0.275089	0.465452	0.021268	0.227921
Statistics
Yeast	Acetic acid in culturing media (g/L)	Statistics on the replicates	LysoPI14:2	LysoPI14:1	LysoPI14:0	LysoPI16:2	LysoPI16:1	LysoPI16:0	LysoPI18:2	LysoPI18:1	LysoPI18:0	LysoPI20:2	LysoPI20:1	LysoPI20:0	LysoPI22:2	LysoPI22:1	LysoPI22:0	PI28:4	PI28:3	PI28:2	PI28:1	PI28:0	PI30:4	PI30:3	PI30:2	PI30:1	PI30:0	PI32:4	PI32:3	PI32:2	PI32:1	PI32:0	PI34:4	PI34:3	PI34:2	PI34:1	PI34:0	PI36:4	PI36:3	PI36:2	PI36:1	PI36:0	PI38:4	PI38:3	PI38:2	PI38:1	PI38:0	PI40:4	PI40:3
S. cerevisiae	0	Average	0.00223522	0.0409342	0.0341822	0.00593586	3.22511	2.76069	0.00298009	12.0849	1.77927	0.00277823	0.00499331	0.0289003	0.0817061	0.078484	0.0935252	0.000955974	0.0127417	0.00506588	0.427092	3.24112	0.0015612	0.000795405	0.0654973	1.03101	0.980464	0.00116524	0.00411701	9.72574	35.0992	1.94003	0.00282042	0.00678111	27.2147	147.071	7.70919	0.00542421	0.00791447	3.78001	42.7208	2.95496	0.0095024	0.094082	0.307754	0.219261	0.653402	0.00415046	0.198344
	9		0.00275113	0.00490891	0.00682757	0.00291103	0.478976	1.50321	0.00291175	2.0018	1.2393	0.00202066	0.00199584	0.00360046	0.00424265	0.0153862	0.00831781	0.00276674	0.0390985	0.00258747	0.271572	3.20037	0.000638639	0.00105941	0.0424198	0.955283	1.1519	0.00073729	0.00111336	9.40871	61.0654	2.97417	0.00130908	0.00976449	27.9725	224.879	11.3577	0.00498424	0.00686636	2.30601	52.9616	3.30603	0.00245121	0.0278801	0.138347	0.13563	0.268897	0.00463089	0.096461
Z. bailii	0		0.00164796	0.00389316	0.00948552	0.00355612	0.292328	4.952	7.11287	12.232	5.97114	0.0015619	0.00110052	0.0101518	0.0032439	0.080959	0.0517209	0.00112541	0.00195409	0.0016996	0.00265644	0.00181354	0.000511248	0.000550052	0.000752195	0.0077565	0.00232907	0.000970398	0.00135581	0.143938	2.47128	0.169562	0.00855676	2.09188	75.4959	165.552	8.32596	1.76871	4.79028	77.2008	116.764	6.73094	0.00308125	0.00455397	0.0364163	0.143594	0.230736	0.0104723	0.165072
	24		0.00178519	0.00493399	0.0208788	0.00129129	0.066708	6.01361	1.18624	2.98795	20.7395	0.00213719	0.0023533	0.0109093	0.00174852	0.037778	0.0209338	0.00287332	0.00123146	0.00178069	0.0020794	0.0053457	0.000875993	0.00148678	0.00126426	0.0135941	0.00389617	0.000766568	0.000948294	0.0542646	1.62637	0.316327	0.00244701	0.519928	59.3795	174.454	10.1321	0.618113	2.11175	94.5163	173.386	10.0215	0.00296544	0.00272806	0.0308574	0.162879	0.297914	0.0127872	0.129792
S. cerevisiae	0	Median	0.00195041	0.0467802	0.0307582	0.00555248	3.05171	2.7074	0.00301825	10.5206	1.57136	0.00261228	0.0040758	0.030268	0.0776504	0.0729606	0.0944253	0.000919383	0.0107183	0.00430754	0.406695	3.1574	0.00155701	0.000795405	0.0688479	1.03422	0.99691	0.0011608	0.00412014	9.75649	35.359	1.93749	0.00292516	0.00664185	27.6618	148.128	7.74576	0.00496827	0.00720683	4.12165	44.9342	3.10272	0.00977477	0.0913122	0.307082	0.230479	0.582598	0.00382717	0.195039
	9		0.00103095	0.00527858	0.00638459	0.00227247	0.471388	1.52005	0.00125443	2.01975	1.26812	0.00133421	0.00139284	0.00367579	0.00390375	0.0139163	0.00911646	0.00279232	0.0406661	0.00262145	0.26827	3.11861	0.000641892	0.000967751	0.0395197	0.925379	1.08213	0.000836262	0.00105451	9.52394	61.9334	2.9784	0.00113145	0.00963427	28.5511	224.659	11.2266	0.00417774	0.00697423	2.28504	52.4281	3.3136	0.00220195	0.0255939	0.138721	0.136394	0.299564	0.00476602	0.0963835
Z. bailii	0		0.00177014	0.0039324	0.00939086	0.00338483	0.294815	4.94669	7.4327	12.5263	6.14327	0.00162153	0.00121242	0.0100989	0.00323292	0.080732	0.0557218	0.000941434	0.00215381	0.00166156	0.00102544	0.00185275	0.000511248	0.000551278	0.000706924	0.00602127	0.00188509	0.000970398	0.00136172	0.137177	2.2733	0.1573	0.00865292	2.10283	76.0417	165.706	8.14674	1.86826	4.77513	79.8557	113.677	6.60219	0.00291669	0.00475026	0.0391826	0.141355	0.246297	0.0102701	0.175489
	24		0.00135895	0.00470872	0.0214246	0.00135972	0.0779815	6.718	1.36655	3.41604	23.386	0.00190351	0.00172801	0.0115466	0.00168968	0.0422315	0.0245024	0.00102146	0.00129714	0.00148602	0.00223119	0.00226106	0.000730409	0.00120853	0.0007192	0.0129254	0.00325963	0.000769274	0.000762748	0.0502582	1.70855	0.343104	0.00247456	0.550759	63.8283	191.772	11.1791	0.640573	2.2988	90.7114	179.629	10.3927	0.00226706	0.00151267	0.024087	0.148324	0.279737	0.0110053	0.116563
S. cerevisiae	0	Standard deviation	0.00127505	0.0124715	0.0138504	0.00513337	1.14554	0.83959	0.000622109	5.27461	0.558869	0.00124876	0.00348066	0.0146013	0.0274469	0.0304402	0.0431736	0.000225394	0.00580596	0.00307658	0.0877268	0.677628	0.00107958	0.000209287	0.0249947	0.196151	0.208454	0.000162702	0.000987512	2.11473	7.37615	0.352176	0.000732234	0.00255414	4.85293	33.2329	1.69454	0.00258722	0.00243022	0.854086	10.4746	0.856983	0.00520382	0.0275603	0.0745159	0.0876793	0.412278	0.00250694	0.030027
	9		0.00362519	0.00116875	0.00173932	0.00145574	0.120824	0.213303	0.00357198	0.442332	0.14959	0.00181424	0.00176404	0.000877888	0.00200624	0.00458892	0.00221209	0.00188014	0.00810083	0.000685294	0.0361899	0.374707	2.43707e-05	0.000512837	0.00669262	0.11931	0.166069	0.000255349	0.000383092	1.14069	7.70761	0.345854	0.000470425	0.00140079	2.80947	20.2633	1.22815	0.00234986	0.000779878	0.162866	3.33025	0.196126	0.00118325	0.00515236	0.0283417	0.0103244	0.129143	0.0022916	0.0117866
Z. bailii	0		0.000829905	0.00180823	0.00243749	0.000824768	0.0459739	1.02309	0.909745	1.6636	1.21061	0.000263408	0.000367876	0.00329454	0.000243047	0.0251228	0.0232349	0.00063314	0.000862274	0.000494407	0.00354593	0.00116965	0.000116674	0.000162608	0.000229352	0.00515267	0.00163743	0.000273588	0.000212537	0.0212119	0.438536	0.048596	0.00251123	0.332726	9.98637	21.6164	1.43257	0.30849	0.523089	11.7958	20.4865	1.03599	0.00198834	0.00254349	0.00682887	0.0691541	0.174554	0.00188592	0.0565481
	24		0.00108679	0.00234528	0.0116453	0.000281046	0.0297903	2.0344	0.460912	1.13959	6.91539	0.00105821	0.00144469	0.0024788	0.000481014	0.0192419	0.00930239	0.00407365	0.00056434	0.00119457	0.000722671	0.00696746	0.000430207	0.000884329	0.00115309	0.00655294	0.00287548	0.000165677	0.000527949	0.0323856	0.670155	0.0804954	0.00132987	0.189431	20.1928	56.5795	3.37215	0.209757	0.63149	37.893	57.6283	3.41754	0.00162434	0.00266799	0.0200399	0.0851341	0.140198	0.00596312	0.0718438
S. cerevisiae	0	Variance	1.62575e-06	0.000155538	0.000191834	2.63515e-05	1.31226	0.704911	3.8702e-07	27.8215	0.312335	1.5594e-06	1.2115e-05	0.000213198	0.000753332	0.000926606	0.00186396	5.08025e-08	3.37092e-05	9.46534e-06	0.00769599	0.45918	1.16549e-06	4.3801e-08	0.000624735	0.0384752	0.0434531	2.64719e-08	9.7518e-07	4.47208	54.4076	0.124028	5.36167e-07	6.52363e-06	23.5509	1104.43	2.87147	6.69371e-06	5.90597e-06	0.729463	109.717	0.73442	2.70797e-05	0.00075957	0.00555262	0.00768766	0.169973	6.28475e-06	0.000901621
	9		1.3142e-05	1.36598e-06	3.02523e-06	2.11918e-06	0.0145984	0.0454982	1.2759e-05	0.195658	0.0223772	3.29147e-06	3.11184e-06	7.70687e-07	4.025e-06	2.10582e-05	4.89334e-06	3.53493e-06	6.56234e-05	4.69628e-07	0.00130971	0.140405	5.93931e-10	2.63002e-07	4.47912e-05	0.0142349	0.0275789	6.52031e-08	1.46759e-07	1.30117	59.4073	0.119615	2.213e-07	1.96221e-06	7.89312	410.601	1.50835	5.52184e-06	6.0821e-07	0.0265253	11.0906	0.0384654	1.40008e-06	2.65468e-05	0.000803252	0.000106593	0.0166779	5.25143e-06	0.000138924
Z. bailii	0		6.88742e-07	3.2697e-06	5.94136e-06	6.80242e-07	0.0021136	1.04671	0.827636	2.76756	1.46558	6.93838e-08	1.35333e-07	1.0854e-05	5.90718e-08	0.000631155	0.000539861	4.00866e-07	7.43516e-07	2.44438e-07	1.25736e-05	1.36808e-06	1.36128e-08	2.64414e-08	5.26023e-08	2.655e-05	2.68118e-06	7.48504e-08	4.5172e-08	0.000449945	0.192314	0.00236157	6.30628e-06	0.110707	99.7276	467.269	2.05226	0.0951661	0.273622	139.141	419.697	1.07328	3.9535e-06	6.46934e-06	4.66335e-05	0.00478229	0.0304691	3.55669e-06	0.00319769
	24		1.18111e-06	5.50034e-06	0.000135613	7.89869e-08	0.000887462	4.13878	0.21244	1.29867	47.8226	1.11981e-06	2.08713e-06	6.14445e-06	2.31374e-07	0.000370251	8.65345e-05	1.65946e-05	3.1848e-07	1.427e-06	5.22253e-07	4.85455e-05	1.85078e-07	7.82038e-07	1.32962e-06	4.2941e-05	8.26839e-06	2.74489e-08	2.7873e-07	0.00104883	0.449108	0.00647951	1.76855e-06	0.0358841	407.749	3201.24	11.3714	0.043998	0.39878	1435.88	3321.02	11.6796	2.63848e-06	7.11817e-06	0.000401598	0.00724781	0.0196555	3.55588e-05	0.00516153
All data are expressed as apperent quantities and calculated relative to the appropriate internal standard. See Materials and Methods for more information.
[truncated: 13 more columns]

## Sheet: PS
Phosphatidylserine (PS)
Raw data
Yeast	Acetic acid in culturing media (g/L)	Biological replicates	LysoPS14:2	LysoPS14:1	LysoPS14:0	LysoPS16:2	LysoPS16:1	LysoPS16:0	LysoPS18:2	LysoPS18:1	LysoPS18:0	LysoPS20:2	LysoPS20:1	LysoPS20:0	LysoPS22:2	LysoPS22:1	LysoPS22:0	PS28:4	PS28:3	PS28:2	PS28:1	PS28:0	PS30:4	PS30:3	PS30:2	PS30:1	PS30:0	PS32:4	PS32:3	PS32:2	PS32:1	PS32:0	PS34:4	PS34:3	PS34:2	PS34:1	PS34:0	PS36:4	PS36:3	PS36:2	PS36:1	PS36:0	PS38:4	PS38:3	PS38:2	PS38:1	PS38:0	PS40:4	PS40:3
S. cerevisiae	0	S. cerevisiae repl 1	0.00164068	0.00607831	0.0033418	0	0.472376	0.672335	0	3.86292	0.0686379	0	0	0	0	0	0	0	0	0.000676244	0.0331736	0.0413648	0	0	0.00048178	0.0538183	0.0038849	0	0	1.01578	3.30932	0.174408	0.00899965	0.00184303	15.0758	17.9634	0.984247	0.0296995	0.00148388	0.131565	0.0635731	0.00482393	0	0	0	0.00284863	0	0.000616678	0
		S. cerevisiae repl 2	0.000741433	0.00799043	0.00461308	0	0.760408	1.03411	0	5.10426	0.0868898	0	0	0.000382342	0	0	0	0.00157587	0	0.00061657	0.0421627	0.0452567	0.000390953	0	0.000320341	0.0714058	0.00635859	0	0	1.53999	5.11805	0.261051	0.011602	0.00206241	25.1462	34.2325	1.7402	0.0910861	0.00221052	0.28021	0.131862	0.00484472	0	0	0	0.000440899	0.000943799	0	0
		S. cerevisiae repl 3	0.000932791	0.0167221	0.00641795	0.00028793	0.757758	0.953034	0.000778604	5.91801	0.113983	0.000219781	0	0	0	0	0	0.00121305	0	0.000533267	0.0379063	0.0376635	0	0	0.000316893	0.0658551	0.00385043	0.0002743	0	1.25623	4.2113	0.211963	0.00665391	0.000916606	19.7358	27.062	1.37606	0.0668458	0.00227703	0.308327	0.137811	0.004934	0.000425932	0.000212114	0	0.000325412	0.000334783	0	0
		S. cerevisiae repl 4	0.000752512	0.0199636	0.0155118	0	1.66976	1.94347	0.00035056	12.4401	0.177691	0	0.000304675	0	0	0	0.000691944	0.00129395	0	0.000455178	0.0629375	0.0526409	0	0	0.0010682	0.0813704	0.00743151	0	0.00027898	1.79213	5.34264	0.272468	0.0102525	0.00209602	26.6423	30.8284	1.57859	0.0770076	0.00162799	0.313146	0.161105	0.00570074	0	0	0	0.0010526	0	0	0
	9	S. cerevisiae with acetic acid repl 1	0.000942073	0.00640396	0.00114634	0	0.288073	0.147802	0	1.06089	0.0143399	0	0.000213415	0	0.000289634	0	0	0.000365854	0	0.000402439	0.0306296	0.00777744	0	0	0.00162348	0.0364909	0.00193445	0	0.000301829	2.97917	2.29099	0.0997668	0.000807927	0.00167988	38.2587	12.2153	0.447716	0.00982165	0	0.123941	0.0397546	0.00270274	0	0	0.00178049	0.000612805	0	0	0
		S. cerevisiae with acetic acid repl 2	0.00107483	0.00861656	0.00152015	0	0.514754	0.233445	0	2.30155	0.0379751	0	0	0	0	0	0	0.000672442	0	0	0.0682672	0.0103388	0	0	0.00285788	0.0578103	0.00255206	0.000432795	0	4.91128	3.41451	0.178889	0.00132163	0.00125189	54.5285	15.7594	0.640828	0.0126315	0.000425642	0.151956	0.0537328	0.00353747	0.00101939	0.000386296	0	0.000500755	0	0.000597329	0
		S. cerevisiae with acetic acid repl 3	0.000892985	0.00965859	0.00124791	0	0.492639	0.201105	0	1.73839	0.035727	0	0.000604134	0	0	0	0	0	0	0	0.0535451	0.00823321	0	0	0.00415153	0.0457008	0.00190302	0	0	4.6244	3.20774	0.152043	0.00177276	0.000613573	54.9209	15.0524	0.617923	0.0146899	0.000787262	0.182435	0.043828	0.00219754	0.000305843	0.00027186	0	0.000409678	0	0.000343601	0
		S. cerevisiae with acetic acid repl 4	0.00067134	0.0090496	0.00210679	0.000462179	0.348377	0.162586	0	1.43667	0.026324	0	0.000333983	0	0	0	0.00173739	0.000215908	0	0.000165305	0.0504821	0.0107617	0	0.000202414	0.00397575	0.0490837	0.00231933	0	0.000465552	3.7266	2.61219	0.111114	0.00139834	0.00171883	45.7244	13.727	0.558773	0.00983058	0.000313742	0.149469	0.0426318	0.00489167	0	0.000327236	0.000205788	0.000173739	0	0.000226029	0
Z. bailii	0	Z. bailii repl 1	0.000553602	0.00897385	0.000327513	0.000826177	1.00523	0.117078	1.36055	6.29532	0.0984524	0	0	0	0	0.000354982	0	0	0	0	0	0	0	0	0	0.000777579	0	0	0.000264123	0.0885225	0.0625042	0.00303108	0.00178125	3.91161	25.0127	3.78841	0.11906	0.139332	0.713475	0.448229	0.0630304	0.00155093	0	0	0	0	0	0	0
		Z. bailii repl 2	0.000654685	0.00807277	0.000304177	0	0.688853	0.0895196	1.23947	6.01821	0.10035	0	0.000231658	0.000364609	0	0	0	0	0	0.000298133	0.000145038	0	0	0	0	0.000935696	0	0	0.000325328	0.101739	0.06288	0.002795	0.00160549	2.82405	18.6502	3.39552	0.106413	0.103513	0.551599	0.34497	0.0601242	0.00176463	0	0	0	0	0	0	0.000366624
		Z. bailii repl 3	0.00130183	0.00671055	0.000545678	0.000265044	1.19261	0.181927	1.96376	8.40337	0.134399	0	0	0.00032221	0	0	0.000239059	0	0	0	0	0	0	0	0	0.000919858	0	0	0.000246855	0.133616	0.0661544	0.00327537	0.00311037	4.97575	30.3284	5.33492	0.161804	0.174724	0.80622	0.488902	0.0857846	0.00286351	0.000540482	0	0.000657413	0.000359888	0.000223468	0	0
		Z. bailii repl 4	0.000530696	0.00798803	0.000346792	0	0.677253	0.110743	1.46978	6.37888	0.114936	0	0.00020755	0	0	0.000202295	0.000204922	0	0	0	0.000228567	0	0	0	0	0.00186663	0	0	0.00049917	0.122546	0.0561343	0.00292934	0.00177599	3.5532	22.8791	4.54335	0.16507	0.124961	0.629064	0.374714	0.0739231	0.002375	0	0.000380945	0.000348105	0.000212804	0.000183905	0.000194414	0
	24	Z. bailii with acetic acid repl 1	0.00143726	0.00678809	0.000424108	0	0.0377975	0.0143773	0.100457	0.865204	0.0183403	0	0	0	0	0	0.000626738	0	0	0	0	0	0	0	0	0.00254229	0.000607888	0	0	0.0172259	0.0255808	0.00260591	0.000471231	0.491824	3.93583	0.753197	0.0248857	0.00958013	0.0785307	0.0547924	0.0226592	0.000523067	0	0	0	0.000763395	0	0	0
		Z. bailii with acetic acid repl 2	0.00102595	0.0230073	0.000328757	0	0.0395642	0.0167213	0.0901191	0.746925	0.0178266	0	0	0	0	0	0	0.000782215	0	0	0	0	0	0	0	0.00425684	0.00070286	0	0.000340094	0.0413922	0.0470633	0.00462244	0.000464795	0.470228	4.42505	0.892771	0.0461025	0.015018	0.0983607	0.0693593	0.031521	0.00131219	0.00130936	0.00252803	0	0	0	0	0
		Z. bailii with acetic acid repl 3	0.000497831	0.00543492	0	0	0.011577	0.00433462	0.0242399	0.279483	0.00782419	0	0	0	0.000221963	0	0	0	0	0	0	0.00026477	0	0	0	0.00174875	0.000405875	0	0.000145861	0.00981552	0.0116848	0.00126994	0	0.29132	2.48666	0.370699	0.0126012	0.00649559	0.053807	0.0441262	0.0131354	0.000415388	0.000611983	0	0	0.000242574	0	0	0
		Z. bailii with acetic acid repl 4	0.00202289	0.0129451	0.000863009	0	0.032097	0.00883376	0.077878	0.784493	0.0219688	0	0.000483285	0	0	0	0.000697312	0	0	0.000807777	0	0	0	0.00111846	0	0.00157758	0	0	0	0.0311201	0.0345825	0.00426672	0.00178816	1.18108	7.82451	0.950536	0.0234946	0.0256866	0.19125	0.106934	0.0399953	0.00308267	0	0	0	0	0	0.000545422	0
Statistics
Yeast	Acetic acid in culturing media (g/L)	Statistics on the replicates	LysoPS14:2	LysoPS14:1	LysoPS14:0	LysoPS16:2	LysoPS16:1	LysoPS16:0	LysoPS18:2	LysoPS18:1	LysoPS18:0	LysoPS20:2	LysoPS20:1	LysoPS20:0	LysoPS22:2	LysoPS22:1	LysoPS22:0	PS28:4	PS28:3	PS28:2	PS28:1	PS28:0	PS30:4	PS30:3	PS30:2	PS30:1	PS30:0	PS32:4	PS32:3	PS32:2	PS32:1	PS32:0	PS34:4	PS34:3	PS34:2	PS34:1	PS34:0	PS36:4	PS36:3	PS36:2	PS36:1	PS36:0	PS38:4	PS38:3	PS38:2	PS38:1	PS38:0	PS40:4	PS40:3
S. cerevisiae	0	Average	0.00101685	0.0126886	0.00747116	0.00028793	0.915076	1.15074	0.000564582	6.83132	0.1118	0.000219781	0.000304675	0.000382342	0	0	0.000691944	0.00136096	0	0.000570315	0.044045	0.0442315	0.000390953	0	0.000546803	0.0681124	0.00538136	0.0002743	0.00027898	1.40103	4.49533	0.229972	0.00937702	0.00172952	21.6501	27.5216	1.41978	0.0661598	0.00189986	0.258312	0.123588	0.00507585	0.000425932	0.000212114	0	0.00116689	0.000639291	0.000616678	0
	9		0.000895308	0.00843218	0.0015053	0.000462179	0.410961	0.186234	0	1.63438	0.0285915	0	0.000383844	0	0.000289634	0	0.00173739	0.000418068	0	0.000283872	0.050731	0.00927778	0	0.000202414	0.00315216	0.0472714	0.00217722	0.000432795	0.000383691	4.06036	2.88136	0.135453	0.00132517	0.00131604	48.3581	14.1885	0.56631	0.0117434	0.000508882	0.15195	0.0449868	0.00333236	0.000662618	0.000328464	0.000993138	0.000424244	0	0.000388986	0
Z. bailii	0		0.000760204	0.0079363	0.00038104	0.000545611	0.890986	0.124817	1.50839	6.77395	0.112035	0	0.000219604	0.00034341	0	0.000278638	0.000221991	0	0	0.000298133	0.000186803	0	0	0	0	0.00112494	0	0	0.000333869	0.111606	0.0619182	0.0030077	0.00206827	3.81615	24.2176	4.26555	0.138087	0.135632	0.67509	0.414203	0.0707156	0.00213852	0.000540482	0.000380945	0.000502759	0.000286346	0.000203687	0.000194414	0.000366624
	24		0.00124598	0.0120439	0.000538625	0	0.0302589	0.0110667	0.0731735	0.669026	0.01649	0	0.000483285	0	0.000221963	0	0.000662025	0.000782215	0	0.000807777	0	0.00026477	0	0.00111846	0	0.00253137	0.000572208	0	0.000242977	0.0248884	0.0297278	0.00319125	0.00090806	0.608614	4.66801	0.741801	0.026771	0.0141951	0.105487	0.0688029	0.0268277	0.00133333	0.000960672	0.00252803	0	0.000502984	0	0.000545422	0
S. cerevisiae	0	Median	0.000842652	0.0123563	0.00551551	0.00028793	0.759083	0.993571	0.000564582	5.51114	0.100436	0.000219781	0.000304675	0.000382342	0	0	0.000691944	0.00129395	0	0.000574918	0.0400345	0.0433107	0.000390953	0	0.00040106	0.0686304	0.00512174	0.0002743	0.00027898	1.39811	4.66467	0.236507	0.00962608	0.00195272	22.441	28.9452	1.47733	0.0719267	0.00191926	0.294269	0.134837	0.00488936	0.000425932	0.000212114	0	0.000746749	0.000639291	0.000616678	0
	9		0.000917529	0.00883308	0.00138403	0.000462179	0.420508	0.181845	0	1.58753	0.0310255	0	0.000333983	0	0.000289634	0	0.00173739	0.000365854	0	0.000283872	0.0520136	0.009286	0	0.000202414	0.00341681	0.0473923	0.00212689	0.000432795	0.000383691	4.1755	2.90997	0.131579	0.00135999	0.00146588	50.1264	14.3897	0.588348	0.0112311	0.000425642	0.150713	0.0432299	0.00312011	0.000662618	0.000327236	0.000993138	0.000455216	0	0.000343601	0
Z. bailii	0		0.000604144	0.0080304	0.000337152	0.000545611	0.847039	0.113911	1.41517	6.3371	0.107643	0	0.000219604	0.00034341	0	0.000278638	0.000221991	0	0	0.000298133	0.000186803	0	0	0	0	0.000927777	0	0	0.000294726	0.112143	0.0626921	0.00298021	0.00177862	3.73241	23.9459	4.16588	0.140432	0.132146	0.67127	0.411471	0.0684767	0.00206981	0.000540482	0.000380945	0.000502759	0.000286346	0.000203687	0.000194414	0.000366624
	24		0.0012316	0.00986661	0.000424108	0	0.0349473	0.0116055	0.0839986	0.765709	0.0180834	0	0.000483285	0	0.000221963	0	0.000662025	0.000782215	0	0.000807777	0	0.00026477	0	0.00111846	0	0.00214552	0.000607888	0	0.000242977	0.024173	0.0300817	0.00343631	0.000471231	0.481026	4.18044	0.822984	0.0241901	0.0122991	0.0884457	0.0620758	0.0270901	0.000917631	0.000960672	0.00252803	0	0.000502984	0	0.000545422	0
S. cerevisiae	0	Standard deviation	0.000425033	0.00670729	0.00550703	0	0.520963	0.550751	0.000302673	3.83347	0.047714	0	0	0	0	0	0	0.000190462	0	9.65911e-05	0.0131192	0.00640643	0	0	0.000356008	0.0114897	0.00180197	0	0	0.337467	0.929694	0.0454001	0.00210355	0.000553429	5.29248	7.01287	0.32634	0.0262603	0.000402376	0.085737	0.0419525	0.00041932	0	0	0	0.00116569	0.00043064	0	0
	9		0.000167912	0.00141809	0.000430935	0	0.110246	0.0386707	0	0.524059	0.0107582	0	0.000200075	0	0	0	0	0.000232703	0	0.000167679	0.0154873	0.00149107	0	0	0.00116912	0.00881364	0.000313487	0	0.00011577	0.879881	0.520181	0.0366418	0.000397173	0.000513873	7.95988	1.56207	0.0862905	0.00236802	0.000247491	0.0239446	0.0060761	0.00117725	0.000504557	5.7228e-05	0.00111348	0.000186524	0	0.000189765	0
Z. bailii	0		0.000365082	0.000931	0.000111133	0.000396781	0.252038	0.0398554	0.317819	1.09717	0.0166293	0	1.70471e-05	2.99806e-05	0	0.000107966	2.41384e-05	0	0	0	5.90642e-05	0	0	0	0	0.000499546	0	0	0.000115229	0.0202841	0.00418998	0.000202958	0.00069951	0.895763	4.85667	0.857386	0.0297535	0.0299298	0.109601	0.0660564	0.0116705	0.000596264	0	0	0.000218713	0.000104004	2.79757e-05	0	0
	24		0.000645064	0.00800648	0.000284942	0	0.0128558	0.00557497	0.0339027	0.264342	0.00606419	0	0	0	0	0	4.99033e-05	0	0	0	0	0	0	0	0	0.00122469	0.000151674	0	0.000137343	0.0141081	0.014909	0.00155338	0.000762191	0.392083	2.25956	0.260902	0.0140093	0.00843233	0.0600097	0.0274439	0.0115509	0.00123285	0.00049312	0	0	0.000368276	0	0	0
S. cerevisiae	0	Variance	1.80653e-07	4.49877e-05	3.03274e-05	0	0.271402	0.303327	9.16109e-08	14.6955	0.00227663	0	0	0	0	0	0	3.62758e-08	0	9.32984e-09	0.000172113	4.10423e-05	0	0	1.26742e-07	0.000132013	3.2471e-06	0	0	0.113884	0.864331	0.00206117	4.42492e-06	3.06284e-07	28.0103	49.1803	0.106498	0.000689603	1.61906e-07	0.00735083	0.00176001	1.75829e-07	0	0	0	1.35883e-06	1.85451e-07	0	0
	9		2.81944e-08	2.01098e-06	1.85705e-07	0	0.0121542	0.00149542	0	0.274638	0.000115739	0	4.003e-08	0	0	0	0	5.41507e-08	0	2.81162e-08	0.000239856	2.22329e-06	0	0	1.36684e-06	7.76803e-05	9.82741e-08	0	1.34027e-08	0.774191	0.270588	0.00134262	1.57746e-07	2.64065e-07	63.3597	2.44006	0.00744605	5.60752e-06	6.12518e-08	0.000573344	3.6919e-05	1.38592e-06	2.54578e-07	3.27504e-09	1.23984e-06	3.47912e-08	0	3.60108e-08	0
Z. bailii	0		1.33285e-07	8.66761e-07	1.23505e-08	1.57435e-07	0.0635232	0.00158845	0.101009	1.20378	0.000276534	0	2.90604e-10	8.98836e-10	0	1.16567e-08	5.82662e-10	0	0	0	3.48858e-09	0	0	0	0	2.49546e-07	0	0	1.32777e-08	0.000411445	1.75559e-05	4.11919e-08	4.89314e-07	0.802391	23.5872	0.735111	0.000885271	0.000895793	0.0120124	0.00436345	0.000136201	3.55531e-07	0	0	4.78354e-08	1.08168e-08	7.8264e-10	0	0
	24		4.16108e-07	6.41037e-05	8.11919e-08	0	0.000165272	3.10803e-05	0.00114939	0.0698767	3.67744e-05	0	0	0	0	0	2.49034e-09	0	0	0	0	0	0	0	0	1.49987e-06	2.3005e-08	0	1.88631e-08	0.000199038	0.000222278	2.41299e-06	5.80935e-07	0.153729	5.10561	0.0680699	0.00019626	7.11042e-05	0.00360116	0.000753168	0.000133423	1.51992e-06	2.43167e-07	0	0	1.35627e-07	0	0	0
All data are expressed as apperent quantities and calculated relative to the appropriate internal standard. See Materials and Methods for more information.
[truncated: 13 more columns]

## Sheet: Cer
Ceramides (Cer)
Raw data
Yeast	Acetic acid in culturing media (g/L)	Biological replicates	DHC-A 18:0/14:0	DHC-A 18:0/16:0	DHC-A 18:0/18:0	DHC-A 18:0/20:0	DHC-A 18:0/22:0	DHC-A 18:0/24:0	DHC-A 18:0/26:0	DHC-A 20:0/16:0	DHC-A 20:0/18:0	DHC-A 20:0/20:0	DHC-A 20:0/22:0	DHC-A 20:0/24:0	DHC-A' 20:0/26:0	DHC-B' 18:0/14:0	DHC-B' 18:0/16:0	DHC-B' 18:0/18:0	DHC-B' 18:0/20:0	DHC-B' 18:0/22:0	DHC-B' 18:0/24:0	DHC-B' 18:0/26:0	DHC-B' 20:0/16:0	DHC-B' 20:0/18:0	DHC-B' 20:0/20:0	DHC-B' 20:0/22:0	DHC-B' 20:0/24:0	DHC-B' 20:0/26:0	PHC-B 18:0/14:0	PHC-B 18:0/16:0	PHC-B 18:0/18:0	PHC-B 18:0/20:0	PHC-B 18:0/22:0	PHC-B 18:0/24:0	PHC-B 18:0/26:0	PHC-B 20:0/16:0	PHC-B 20:0/18:0	PHC-B 20:0/20:0	PHC-B 20:0/22:0	PHC-B 20:0/24:0	PHC-B 20:0/26:0	PHC-C 18:0/14:0	PHC-C 18:0/16:0	PHC-C 18:0/18:0	PHC-C 18:0/20:0	PHC-C 18:0/22:0	PHC-C 18:0/24:0	PHC-C 18:0/26:0	PHC-C 20:0/16:0
S. cerevisiae	0	S. cerevisiae repl 1	1.88713e-08	5.6614e-08	1.13228e-07	6.13318e-08	2.8307e-08	1.88713e-08	2.8307e-07	5.18962e-08	5.18962e-08	2.08056e-06	5.6614e-08	2.8307e-08	1.03792e-07	1.88713e-08	2.8307e-08	5.18962e-08	1.93431e-07	9.43567e-09	1.88713e-08	2.12774e-06	1.88713e-08	3.77427e-08	5.6614e-08	3.30248e-08	1.88713e-08	5.2368e-07	4.19887e-07	1.32099e-07	4.24605e-08	8.44492e-07	5.18962e-08	2.12303e-07	3.00054e-06	2.8307e-08	3.77427e-08	6.60497e-08	6.13318e-08	1.69842e-07	1.06151e-06	1.88713e-08	2.64199e-07	3.25531e-07	2.92506e-07	6.13318e-08	6.59553e-06	0.00198066	5.6614e-08
		S. cerevisiae repl 2	7.11884e-09	1.06783e-08	1.0263e-07	4.21198e-08	9.49179e-09	5.33913e-09	6.88155e-08	8.30531e-09	2.96618e-08	3.39925e-07	1.06783e-08	7.71208e-09	2.96618e-08	5.33913e-09	1.30512e-08	5.5171e-08	4.86454e-08	7.11884e-09	4.74589e-09	4.81115e-07	2.13565e-08	4.2713e-08	6.88155e-08	2.49159e-08	4.74589e-09	4.21198e-08	1.6492e-07	1.66106e-08	8.89855e-09	1.75005e-07	9.49179e-09	2.43227e-08	7.1663e-07	1.2458e-08	1.95768e-08	4.15266e-09	1.0085e-08	2.07633e-08	3.67214e-07	4.74589e-09	1.15088e-07	8.60193e-08	7.89005e-08	1.72039e-08	1.38343e-06	0.000452061	2.19498e-08
		S. cerevisiae repl 3	5.22484e-09	9.86915e-09	4.41209e-08	2.96074e-08	8.12753e-09	4.6443e-09	6.1537e-08	1.74161e-08	3.42517e-08	3.80252e-07	2.03188e-08	1.39329e-08	3.54128e-08	2.32215e-09	4.6443e-09	1.27718e-08	6.0376e-08	4.6443e-09	1.16108e-09	5.04488e-07	1.04497e-08	8.70807e-09	3.42517e-08	8.70807e-09	6.38592e-09	6.32787e-08	6.32787e-08	1.10302e-08	6.96646e-09	1.70678e-07	5.80538e-09	4.17987e-08	6.44978e-07	1.21913e-08	1.27718e-08	3.48323e-09	6.96646e-09	6.96646e-09	3.53548e-07	2.90269e-09	6.38592e-08	7.19867e-08	6.26981e-08	2.03188e-08	1.76135e-06	0.000565433	2.14799e-08
		S. cerevisiae repl 4	9.43228e-09	2.89706e-08	9.56703e-08	5.86149e-08	1.61696e-08	5.38988e-09	1.42832e-07	2.42544e-08	7.00684e-08	2.98464e-07	3.57079e-08	7.41108e-09	5.65937e-08	5.38988e-09	1.14535e-08	2.89706e-08	8.21956e-08	4.71614e-09	6.73735e-09	1.28481e-06	1.61696e-08	2.2907e-08	4.37927e-08	1.68434e-08	8.75855e-09	1.42832e-07	1.24641e-07	3.97503e-08	3.50342e-08	3.54384e-07	1.95383e-08	3.63817e-08	3.03854e-06	2.56019e-08	4.24453e-08	2.69494e-08	4.98564e-08	2.129e-07	1.76182e-06	6.73735e-09	1.73824e-07	1.25988e-07	8.96067e-08	3.03181e-08	2.44296e-06	0.00167868	2.42544e-08
	9	S. cerevisiae with acetic acid repl 1	1.63593e-07	4.08983e-07	4.18278e-07	2.97442e-07	1.3199e-07	1.95196e-07	2.49108e-07	3.08596e-07	1.18419e-06	1.29759e-06	2.49108e-07	1.63593e-07	8.92326e-08	1.20836e-07	2.30518e-07	2.04491e-07	6.65526e-07	1.72888e-07	1.46862e-07	4.31291e-07	2.91865e-07	3.75521e-07	2.73275e-07	1.5058e-07	9.66686e-08	2.30518e-07	9.90296e-06	9.46237e-07	9.51814e-07	3.74033e-06	9.85277e-07	1.44445e-06	4.15675e-06	7.62195e-07	1.90177e-06	1.28272e-07	1.24554e-07	4.35009e-07	1.73632e-06	5.81871e-07	1.05964e-06	9.23929e-07	5.98602e-07	7.12002e-07	1.72554e-05	0.00200844	2.30518e-07
		S. cerevisiae with acetic acid repl 2	1.90881e-06	8.34145e-07	3.59757e-06	1.39195e-06	1.13096e-06	3.83041e-06	6.14095e-07	1.57618e-06	5.29657e-07	1.46103e-05	8.13675e-07	6.91112e-06	4.07605e-06	0	5.52685e-07	1.19748e-06	4.65433e-06	6.0386e-07	3.24447e-06	1.18725e-06	8.0344e-07	9.56964e-07	0	0	2.57408e-06	5.01511e-07	2.86066e-06	8.4438e-07	1.01837e-06	2.03726e-05	1.00814e-06	1.99325e-06	6.78063e-06	9.77434e-07	6.37123e-07	4.55453e-07	9.56964e-07	2.53826e-06	7.50986e-06	5.57803e-07	1.81158e-06	1.55059e-06	1.42521e-06	1.02861e-06	1.79571e-05	0.00175294	1.23587e-06
		S. cerevisiae with acetic acid repl 3	2.28111e-07	3.99194e-07	5.98791e-07	2.33814e-07	3.47869e-07	1.39718e-07	4.02046e-07	3.45018e-07	1.21754e-06	1.27457e-06	2.42368e-07	1.76786e-07	7.69875e-08	1.51124e-07	1.59678e-07	1.45421e-07	5.1325e-07	1.39718e-07	4.27708e-08	1.26887e-06	2.85139e-07	5.36061e-07	3.16504e-07	2.59476e-07	7.98389e-08	3.42167e-07	6.44128e-06	1.28883e-06	9.89432e-07	2.32388e-06	8.8393e-07	1.12915e-06	6.24739e-06	1.03505e-06	2.10147e-06	2.70882e-07	2.19557e-07	3.93492e-07	2.94833e-06	1.29738e-06	1.37437e-06	1.16907e-06	9.01039e-07	6.38711e-07	1.54403e-05	0.00200386	5.50318e-07
		S. cerevisiae with acetic acid repl 4	2.68591e-07	5.07591e-07	7.67077e-07	3.23219e-07	1.66162e-07	1.52505e-07	4.41581e-07	4.14267e-07	3.10018e-06	2.15328e-06	2.91353e-07	1.86648e-07	1.09257e-07	2.93629e-07	3.00458e-07	3.23219e-07	1.14265e-06	1.22914e-07	1.18362e-07	1.06298e-06	4.91658e-07	6.82858e-07	2.34448e-07	1.72991e-07	1.09257e-07	2.29896e-07	7.70264e-06	1.44083e-06	1.64796e-06	3.73523e-06	1.19955e-06	1.82323e-06	6.80354e-06	1.01518e-06	2.92946e-06	2.868e-07	3.27772e-07	4.78001e-07	2.63356e-06	1.91428e-06	1.27239e-06	1.07209e-06	1.34751e-06	7.26106e-07	1.96777e-05	0.00251056	6.44163e-07
Z. bailii	0	Z. bailii repl 1	1.15189e-07	2.31272e-07	1.47335e-07	2.0627e-07	1.75017e-07	6.25059e-08	2.59846e-07	1.41799e-06	1.23672e-06	1.7457e-06	8.16149e-07	1.60729e-07	2.74133e-07	1.30369e-07	5.08977e-08	6.51847e-08	3.81286e-07	4.37541e-08	4.46471e-08	3.92894e-08	1.90197e-07	8.71511e-07	3.92001e-07	1.70552e-07	1.28584e-07	2.19664e-07	2.05644e-06	6.05414e-07	4.7058e-07	1.57515e-06	3.76821e-07	8.6526e-07	5.58089e-07	3.8843e-07	1.29209e-06	7.85789e-08	1.31262e-07	1.16975e-07	9.48304e-07	3.85751e-07	2.54488e-07	1.85732e-07	2.6699e-07	2.87527e-07	9.3491e-07	5.12548e-07	8.57224e-08
		Z. bailii repl 2	1.23359e-07	3.08398e-07	2.15067e-07	2.67819e-07	3.67643e-07	4.86944e-08	4.67466e-07	9.9012e-07	1.27336e-06	2.27646e-06	8.765e-07	1.97212e-07	1.95589e-07	1.31475e-07	2.00459e-07	7.62879e-08	5.28334e-07	1.24171e-07	6.97953e-08	5.35639e-08	2.77558e-07	9.60903e-07	3.53846e-07	1.81793e-07	1.67184e-07	1.60692e-07	2.92897e-06	1.02177e-06	5.16972e-07	2.41768e-06	7.5801e-07	1.14107e-06	9.34121e-07	4.56104e-07	1.7108e-06	1.97212e-07	1.58257e-07	2.00459e-07	8.47283e-07	1.01203e-06	6.50882e-07	2.59704e-07	4.78828e-07	4.28511e-07	1.66291e-06	4.61785e-07	1.24171e-07
		Z. bailii repl 3	1.63399e-07	1.63399e-07	1.3369e-07	2.16065e-07	1.60699e-07	3.24098e-08	1.68801e-07	9.96601e-07	2.00536e-06	1.40037e-06	4.28079e-07	1.62049e-07	8.64261e-08	7.02212e-08	1.24238e-07	3.51106e-08	4.25379e-07	2.29569e-08	2.56578e-08	3.24098e-08	1.72852e-07	5.98231e-07	1.9851e-07	6.75204e-08	9.31782e-08	9.18278e-08	1.0047e-06	3.24098e-07	1.6475e-07	1.49895e-06	2.53877e-07	6.58999e-07	2.91688e-07	3.52457e-07	1.72852e-06	6.07684e-08	8.37253e-08	7.69733e-08	7.17067e-07	3.38952e-07	2.60629e-07	1.45844e-07	1.55297e-07	9.5879e-08	5.9553e-07	2.83586e-07	4.72643e-08
		Z. bailii repl 4	1.22446e-06	6.73658e-07	6.97125e-07	1.01739e-06	1.18442e-06	2.20871e-07	1.90087e-06	1.90916e-06	4.14962e-06	4.23383e-06	1.69795e-06	7.4406e-07	4.3346e-07	8.17224e-07	3.90666e-07	2.98176e-07	1.93539e-06	3.20263e-07	2.52622e-07	2.82991e-07	1.19132e-06	2.34262e-06	1.32799e-06	4.43123e-07	5.48037e-07	4.21036e-07	5.08694e-06	3.11429e-06	1.97818e-06	5.01102e-06	2.34952e-06	3.7769e-06	2.02649e-06	1.41634e-06	4.56652e-06	5.97733e-07	6.69516e-07	5.54939e-07	1.9064e-06	3.15984e-06	7.63387e-07	7.4268e-07	1.01463e-06	1.38183e-06	4.68247e-06	1.02153e-06	5.97733e-07
	24	Z. bailii with acetic acid repl 1	7.59442e-07	1.77647e-06	1.83865e-06	1.37677e-06	2.35827e-06	4.70765e-07	3.23762e-06	1.80756e-06	6.10662e-06	6.96377e-06	3.36641e-06	7.19471e-07	1.00815e-06	4.35236e-07	1.65656e-06	6.97265e-07	3.322e-06	3.64177e-07	3.24206e-07	5.68471e-07	1.34568e-06	2.42933e-06	1.02147e-06	7.59442e-07	7.06147e-07	6.795e-07	6.79056e-06	5.92453e-06	2.98003e-06	1.14449e-05	1.00282e-05	1.9892e-05	4.58774e-06	2.83347e-06	1.35545e-05	1.35012e-06	1.26973e-05	2.11311e-05	5.99559e-06	3.41971e-06	1.01703e-06	1.31015e-06	1.8653e-06	1.21688e-06	6.37309e-06	2.63806e-06	1.76759e-06
		Z. bailii with acetic acid repl 2	4.30526e-07	2.90444e-06	2.02411e-06	1.19519e-06	2.15263e-06	4.88358e-07	3.61128e-06	6.54142e-06	7.76232e-06	9.22097e-06	5.00567e-06	1.67712e-06	1.27873e-06	6.3615e-07	7.38962e-07	1.06025e-06	2.81448e-06	2.44179e-07	2.18476e-07	5.01209e-07	1.34298e-06	3.71409e-06	1.33013e-06	6.93982e-07	6.3615e-07	3.85546e-07	1.65528e-05	1.147e-05	5.25627e-06	1.67777e-05	5.77033e-06	1.46315e-05	7.46031e-06	1.03005e-05	2.5189e-05	1.31728e-06	6.68279e-07	1.35584e-06	7.11974e-06	5.15989e-06	2.45464e-06	2.33898e-06	2.89159e-06	2.87231e-06	1.23182e-05	3.7655e-06	7.83943e-07
		Z. bailii with acetic acid repl 3	2.81529e-07	4.84632e-07	4.12239e-07	2.59409e-07	7.56106e-07	1.7495e-07	6.13331e-07	4.92675e-07	3.95347e-06	3.07269e-06	1.3252e-06	3.76042e-07	2.75496e-07	2.55387e-07	4.42402e-07	3.23758e-07	6.85724e-07	1.34732e-07	9.25023e-08	1.70928e-07	3.55933e-07	1.24677e-06	3.70009e-07	1.38753e-07	5.83167e-08	2.91583e-07	2.08532e-06	3.45476e-06	1.23068e-06	7.06034e-06	1.2528e-06	2.74491e-06	2.07326e-06	1.01551e-06	4.75381e-06	2.07125e-07	2.17179e-07	3.19736e-07	3.80064e-06	1.00144e-06	6.17352e-07	4.30337e-07	6.53549e-07	7.84259e-07	2.68056e-06	6.97789e-07	2.73485e-07
		Z. bailii with acetic acid repl 4	2.71698e-06	1.29271e-05	4.34716e-06	6.71141e-06	1.02768e-05	2.56444e-06	9.67625e-06	1.68929e-05	2.24508e-05	1.96004e-05	1.33465e-05	3.34617e-06	2.82184e-06	4.2709e-06	3.13644e-06	4.0707e-06	9.79065e-06	1.39185e-06	1.84945e-06	8.67526e-07	3.79423e-06	8.70386e-06	4.20416e-06	2.29751e-06	1.42999e-06	2.60258e-06	2.35567e-05	1.38232e-05	1.1602e-05	3.70843e-05	1.54057e-05	4.17175e-05	0.000112149	3.14311e-05	6.65039e-05	4.2995e-06	5.56742e-06	6.56841e-06	6.10986e-05	3.2556e-05	1.1888e-05	8.38926e-06	9.55232e-06	1.72933e-05	4.65413e-05	1.05628e-05	1.81132e-06
Statistics
Yeast	Acetic acid in culturing media (g/L)	Statistics on the replicates	DHC-A 18:0/14:0	DHC-A 18:0/16:0	DHC-A 18:0/18:0	DHC-A 18:0/20:0	DHC-A 18:0/22:0	DHC-A 18:0/24:0	DHC-A 18:0/26:0	DHC-A 20:0/16:0	DHC-A 20:0/18:0	DHC-A 20:0/20:0	DHC-A 20:0/22:0	DHC-A 20:0/24:0	DHC-A' 20:0/26:0	DHC-B' 18:0/14:0	DHC-B' 18:0/16:0	DHC-B' 18:0/18:0	DHC-B' 18:0/20:0	DHC-B' 18:0/22:0	DHC-B' 18:0/24:0	DHC-B' 18:0/26:0	DHC-B' 20:0/16:0	DHC-B' 20:0/18:0	DHC-B' 20:0/20:0	DHC-B' 20:0/22:0	DHC-B' 20:0/24:0	DHC-B' 20:0/26:0	PHC-B 18:0/14:0	PHC-B 18:0/16:0	PHC-B 18:0/18:0	PHC-B 18:0/20:0	PHC-B 18:0/22:0	PHC-B 18:0/24:0	PHC-B 18:0/26:0	PHC-B 20:0/16:0	PHC-B 20:0/18:0	PHC-B 20:0/20:0	PHC-B 20:0/22:0	PHC-B 20:0/24:0	PHC-B 20:0/26:0	PHC-C 18:0/14:0	PHC-C 18:0/16:0	PHC-C 18:0/18:0	PHC-C 18:0/20:0	PHC-C 18:0/22:0	PHC-C 18:0/24:0	PHC-C 18:0/26:0	PHC-C 20:0/16:0
S. cerevisiae	0	Average	1.01618e-08	2.6533e-08	8.89123e-08	4.79185e-08	1.5524e-08	8.56116e-09	1.39064e-07	2.5468e-08	4.64695e-08	7.74802e-07	3.08298e-08	1.43408e-08	5.63652e-08	7.98062e-09	1.4364e-08	3.72024e-08	9.6162e-08	6.47874e-09	7.87891e-09	1.09954e-06	1.67118e-08	2.80177e-08	5.08685e-08	2.08731e-08	9.69042e-09	1.92977e-07	1.93182e-07	4.98726e-08	2.33399e-08	3.8614e-07	2.16829e-08	7.87014e-08	1.85017e-06	1.96395e-08	2.81341e-08	2.51587e-08	3.20599e-08	1.02618e-07	8.86022e-07	8.31432e-09	1.54242e-07	1.52381e-07	1.30928e-07	3.22931e-08	3.04582e-06	0.00116921	3.10745e-08
	9		6.42276e-07	5.37478e-07	1.34543e-06	5.61606e-07	4.44245e-07	1.07946e-06	4.26707e-07	6.61014e-07	1.50789e-06	4.83394e-06	3.99126e-07	1.85954e-06	1.08788e-06	1.88529e-07	3.10834e-07	4.67654e-07	1.74394e-06	2.59845e-07	8.88115e-07	9.87598e-07	4.68025e-07	6.37851e-07	2.74742e-07	1.94349e-07	7.14961e-07	3.26023e-07	6.72688e-06	1.13007e-06	1.1519e-06	7.54301e-06	1.01922e-06	1.59752e-06	5.99708e-06	9.47466e-07	1.89246e-06	2.85352e-07	4.07212e-07	9.6119e-07	3.70702e-06	1.08783e-06	1.37949e-06	1.17892e-06	1.06809e-06	7.76357e-07	1.75826e-05	0.00206895	6.65216e-07
Z. bailii	0		4.06601e-07	3.44182e-07	2.98304e-07	4.26886e-07	4.71945e-07	9.11204e-08	6.99247e-07	1.32847e-06	2.16626e-06	2.41409e-06	9.54669e-07	3.16013e-07	2.47402e-07	2.87322e-07	1.91565e-07	1.1869e-07	8.17596e-07	1.27786e-07	9.81805e-08	1.02064e-07	4.57983e-07	1.19332e-06	5.68087e-07	2.15747e-07	2.34246e-07	2.23305e-07	2.76927e-06	1.26639e-06	7.8262e-07	2.6257e-06	9.34557e-07	1.61056e-06	9.52598e-07	6.53332e-07	2.32448e-06	2.33573e-07	2.6069e-07	2.37337e-07	1.10476e-06	1.22414e-06	4.82346e-07	3.3349e-07	4.78936e-07	5.48436e-07	1.96896e-06	5.69862e-07	2.13723e-07
	24		1.04712e-06	4.52316e-06	2.15554e-06	2.38569e-06	3.88596e-06	9.24629e-07	4.28462e-06	6.43364e-06	1.00683e-05	9.71445e-06	5.76096e-06	1.5297e-06	1.34605e-06	1.39942e-06	1.49359e-06	1.53799e-06	4.15321e-06	5.33735e-07	6.21159e-07	5.27034e-07	1.70971e-06	4.02351e-06	1.73144e-06	9.72423e-07	7.0765e-07	9.89802e-07	1.22463e-05	8.66812e-06	5.26724e-06	1.80918e-05	8.11426e-06	1.97465e-05	3.15676e-05	1.13952e-05	2.75003e-05	1.7935e-06	4.78755e-06	7.34378e-06	1.95036e-05	1.05343e-05	3.99425e-06	3.11718e-06	3.74069e-06	5.54169e-06	1.69783e-05	4.41605e-06	1.15908e-06
S. cerevisiae	0	Median	8.27556e-09	1.98244e-08	9.91501e-08	5.03674e-08	1.28307e-08	5.3645e-09	1.05824e-07	2.08353e-08	4.3074e-08	3.60089e-07	2.80134e-08	1.08225e-08	4.60033e-08	5.3645e-09	1.22523e-08	4.04334e-08	7.12858e-08	5.91749e-09	5.74162e-09	8.9465e-07	1.75205e-08	3.03248e-08	5.02034e-08	2.08797e-08	7.57223e-09	1.03055e-07	1.4478e-07	2.81805e-08	2.19664e-08	2.64695e-07	1.4515e-08	3.90902e-08	1.85859e-06	1.90299e-08	2.86597e-08	1.5551e-08	2.99707e-08	9.53026e-08	7.14363e-07	5.74162e-09	1.44456e-07	1.06004e-07	8.42536e-08	2.53184e-08	2.10216e-06	0.00112206	2.31021e-08
	9		2.48351e-07	4.58287e-07	6.82934e-07	3.10331e-07	2.57016e-07	1.73851e-07	4.21814e-07	3.79643e-07	1.20087e-06	1.72543e-06	2.7023e-07	1.81717e-07	9.92449e-08	1.51124e-07	2.65488e-07	2.63855e-07	9.04088e-07	1.56303e-07	1.32612e-07	1.12512e-06	3.91761e-07	6.09459e-07	2.73275e-07	1.72991e-07	1.02963e-07	2.86342e-07	7.07196e-06	1.11753e-06	1.0039e-06	3.73778e-06	9.96708e-07	1.63384e-06	6.51401e-06	9.96308e-07	2.00162e-06	2.78841e-07	2.73664e-07	4.56505e-07	2.79095e-06	9.39626e-07	1.32338e-06	1.12058e-06	1.12427e-06	7.19054e-07	1.76063e-05	0.00200615	5.9724e-07
Z. bailii	0		1.43379e-07	2.69835e-07	1.81201e-07	2.41942e-07	2.7133e-07	5.56002e-08	3.63656e-07	1.2073e-06	1.63936e-06	2.01108e-06	8.46324e-07	1.79631e-07	2.34861e-07	1.30922e-07	1.62348e-07	7.07363e-08	4.76856e-07	8.39625e-08	5.72212e-08	4.64266e-08	2.33877e-07	9.16207e-07	3.72924e-07	1.76172e-07	1.47884e-07	1.90178e-07	2.49271e-06	8.13593e-07	4.93776e-07	1.99641e-06	5.67416e-07	1.00317e-06	7.46105e-07	4.22267e-07	1.71966e-06	1.37896e-07	1.4476e-07	1.58717e-07	8.97793e-07	6.98892e-07	4.55755e-07	2.22718e-07	3.72909e-07	3.58019e-07	1.29891e-06	4.87167e-07	1.04947e-07
	24		5.94984e-07	2.34046e-06	1.93138e-06	1.28598e-06	2.25545e-06	4.79561e-07	3.42445e-06	4.17449e-06	6.93447e-06	8.09237e-06	4.18604e-06	1.1983e-06	1.14344e-06	5.35693e-07	1.19776e-06	8.78758e-07	3.06824e-06	3.04178e-07	2.71341e-07	5.3484e-07	1.34433e-06	3.07171e-06	1.1758e-06	7.26712e-07	6.71149e-07	5.32523e-07	1.16717e-05	8.69726e-06	4.11815e-06	1.41113e-05	7.89926e-06	1.72617e-05	6.02402e-06	6.56698e-06	1.93717e-05	1.3337e-06	3.11785e-06	3.96212e-06	6.55767e-06	4.2898e-06	1.73584e-06	1.82456e-06	2.37844e-06	2.0446e-06	9.34564e-06	3.20178e-06	1.27577e-06
S. cerevisiae	0	Standard deviation	6.05589e-09	2.19079e-08	3.07212e-08	1.48689e-08	9.21805e-09	6.88186e-09	1.0279e-07	1.87911e-08	1.84222e-08	8.71149e-07	2.00432e-08	9.78404e-09	3.36722e-08	7.4008e-09	9.98456e-09	2.00283e-08	6.63195e-08	2.28218e-09	7.68292e-09	7.80612e-07	4.68135e-09	1.53787e-08	1.50697e-08	1.046e-08	6.33839e-09	2.24691e-07	1.56809e-07	5.62103e-08	1.80647e-08	3.17331e-07	2.09616e-08	8.93664e-08	1.35068e-06	8.51912e-09	1.42169e-08	2.93619e-08	2.76052e-08	1.04132e-07	6.70945e-07	7.2101e-09	8.59767e-08	1.17678e-07	1.08285e-07	2.01512e-08	2.40675e-06	0.000773919	1.70694e-08
	9		8.45463e-07	2.03747e-07	1.50817e-06	5.54835e-07	4.6751e-07	1.83412e-06	1.49983e-07	6.1168e-07	1.10776e-06	6.53041e-06	2.77215e-07	3.36774e-06	1.99216e-06	9.22701e-08	1.71171e-07	4.92139e-07	1.9587e-06	2.30281e-07	1.57151e-06	3.80409e-07	2.43271e-07	2.47007e-07	4.10477e-08	5.75042e-08	1.23947e-06	1.28346e-07	2.94781e-06	2.81181e-07	3.31833e-07	8.57898e-06	1.31781e-07	3.87448e-07	1.2535e-06	1.25805e-07	9.47807e-07	1.3394e-07	3.75787e-07	1.05194e-06	2.58671e-06	6.49064e-07	3.16493e-07	2.675e-07	3.88988e-07	1.72476e-07	1.7537e-06	0.00031769	4.19622e-07
Z. bailii	0		5.45643e-07	2.27498e-07	2.68251e-07	3.94594e-07	4.84267e-07	8.73709e-08	8.10777e-07	4.35824e-07	1.36881e-06	1.26554e-06	5.33872e-07	2.85865e-07	1.45979e-07	3.54425e-07	1.46106e-07	1.20915e-07	7.47736e-07	1.35537e-07	1.04536e-07	1.2094e-07	4.91037e-07	7.81578e-07	5.13466e-07	1.60069e-07	2.11366e-07	1.41795e-07	1.73387e-06	1.26483e-06	8.12211e-07	1.6438e-06	9.67416e-07	1.45767e-06	7.62897e-07	5.10482e-07	1.50824e-06	2.50213e-07	2.74287e-07	2.17895e-07	5.4274e-07	1.32645e-06	2.63607e-07	2.76842e-07	3.81501e-07	5.72073e-07	1.86301e-06	3.16714e-07	2.57925e-07
	24		1.131e-06	5.68918e-06	1.62891e-06	2.92507e-06	4.31963e-06	1.10262e-06	3.83395e-06	7.44096e-06	8.40099e-06	7.06291e-06	5.27641e-06	1.33025e-06	1.07125e-06	1.92063e-06	1.21106e-06	1.71503e-06	3.92799e-06	5.79703e-07	8.2432e-07	2.8585e-07	1.46571e-06	3.27888e-06	1.69636e-06	9.2624e-07	5.62293e-07	1.08781e-06	9.65195e-06	4.80041e-06	4.53336e-06	1.32705e-05	6.03883e-06	1.63091e-05	5.37661e-05	1.39485e-05	2.73161e-05	1.75309e-06	5.80315e-06	9.58966e-06	2.77642e-05	1.47799e-05	5.32129e-06	3.60023e-06	3.98093e-06	7.88592e-06	2.01046e-05	4.28925e-06	7.57343e-07
S. cerevisiae	0	Variance	3.66738e-17	4.79956e-16	9.43792e-16	2.21084e-16	8.49724e-17	4.736e-17	1.05658e-14	3.53105e-16	3.39377e-16	7.58901e-13	4.0173e-16	9.57274e-17	1.13382e-15	5.47718e-17	9.96914e-17	4.01133e-16	4.39828e-15	5.20835e-18	5.90273e-17	6.09355e-13	2.1915e-17	2.36504e-16	2.27096e-16	1.09412e-16	4.01752e-17	5.0486e-14	2.45891e-14	3.1596e-15	3.26333e-16	1.00699e-13	4.39389e-16	7.98635e-15	1.82434e-12	7.25754e-17	2.0212e-16	8.62121e-16	7.62047e-16	1.08435e-14	4.50167e-13	5.19855e-17	7.39199e-15	1.38481e-14	1.17256e-14	4.06071e-16	5.79245e-12	5.98951e-07	2.91364e-16
	9		7.14808e-13	4.15128e-14	2.27458e-12	3.07842e-13	2.18566e-13	3.364e-12	2.24949e-14	3.74152e-13	1.22713e-12	4.26463e-11	7.68482e-14	1.13417e-11	3.9687e-12	8.51377e-15	2.92995e-14	2.42201e-13	3.83651e-12	5.30293e-14	2.46964e-12	1.44711e-13	5.91808e-14	6.10125e-14	1.68491e-15	3.30673e-15	1.53629e-12	1.64727e-14	8.68958e-12	7.90628e-14	1.10113e-13	7.35989e-11	1.73662e-14	1.50116e-13	1.57126e-12	1.58269e-14	8.98338e-13	1.79399e-14	1.41216e-13	1.10658e-12	6.69107e-12	4.21284e-13	1.00168e-13	7.15562e-14	1.51312e-13	2.9748e-14	3.07546e-12	1.00927e-07	1.76083e-13
Z. bailii	0		2.97726e-13	5.17553e-14	7.19586e-14	1.55704e-13	2.34515e-13	7.63367e-15	6.57359e-13	1.89943e-13	1.87364e-12	1.60159e-12	2.85019e-13	8.17188e-14	2.13099e-14	1.25617e-13	2.1347e-14	1.46204e-14	5.59109e-13	1.83703e-14	1.09278e-14	1.46265e-14	2.41117e-13	6.10864e-13	2.63647e-13	2.56221e-14	4.46756e-14	2.01058e-14	3.00631e-12	1.59979e-12	6.59687e-13	2.70208e-12	9.35894e-13	2.1248e-12	5.82012e-13	2.60592e-13	2.27479e-12	6.26065e-14	7.52334e-14	4.74782e-14	2.94567e-13	1.75947e-12	6.94887e-14	7.66415e-14	1.45543e-13	3.27268e-13	3.47081e-12	1.00308e-13	6.65253e-14
	24		1.27916e-12	3.23668e-11	2.65335e-12	8.55603e-12	1.86592e-11	1.21577e-12	1.46992e-11	5.53679e-11	7.05766e-11	4.98847e-11	2.78405e-11	1.76957e-12	1.14758e-12	3.68882e-12	1.46667e-12	2.94133e-12	1.54291e-11	3.36056e-13	6.79503e-13	8.17102e-14	2.14831e-12	1.07511e-11	2.87764e-12	8.57921e-13	3.16173e-13	1.18333e-12	9.31601e-11	2.30439e-11	2.05514e-11	1.76106e-10	3.64675e-11	2.65987e-10	2.89079e-09	1.94561e-10	7.46169e-10	3.07332e-12	3.36765e-11	9.19616e-11	7.70851e-10	2.18445e-10	2.83161e-11	1.29617e-11	1.58478e-11	6.21877e-11	4.04195e-10	1.83977e-11	5.73568e-13
All data are expressed as apperent quantities and calculated relative to the appropriate internal standard. See Materials and Methods for more information.
[truncated: 17 more columns]

## Sheet: SL
Complex Sphingolipids (SL)
Raw data
Yeast	Acetic acid in culturing media (g/L)	Biological replicates	IPC-A d32:0	IPC-A d34:0	IPC-A d36:0	IPC-A d38:0	IPC-A d40:0	IPC-A d42:0	IPC-A d44:0	IPC-A d46:0	IPC-B d/t32:0	IPC-B d/t34:0	IPC-B d/t36:0	IPC-B d/t38:0	IPC-B d/t40:0	IPC-B d/t42:0	IPC-B d/t44:0	IPC-B d/t46:0	IPC-C t32:0	IPC-C t34:0	IPC-C t36:0	IPC-C t38:0	IPC-C t40:0	IPC-C t42:0	IPC-C t44:0	IPC-C t46:0	IPC-D t32:0	IPC-D t34:0	IPC-D t36:0	IPC-D t38:0	IPC-D t40:0	IPC-D t42:0	IPC-D t44:0	IPC-D t46:0	M(IP)2C-A d32:0	M(IP)2C-A d34:0	M(IP)2C-A d36:0	M(IP)2C-A d38:0	M(IP)2C-A d40:0	M(IP)2C-A d42:0	M(IP)2C-A d44:0	M(IP)2C-A d46:0	M(IP)2C-B d/t32:0	M(IP)2C-B d/t34:0	M(IP)2C-B d/t36:0	M(IP)2C-B d/t38:0	M(IP)2C-B d/t40:0	M(IP)2C-B d/t42:0	M(IP)2C-B d/t44:0
S. cerevisiae	0	S. cerevisiae repl 1	0.00236048	0.00173696	0.00433382	0.00705231	0.00673541	0.0067868	0.100504	0.0786803	0	0.00403577	0.0113741	0.00572647	0.00306794	0.0125886	1.37564	1.33318	0.00603652	0.00837987	0.0230823	0.0216571	0.0127685	0.562775	72.645	34.4878	0	0.00189284	0	0	0.00156223	0.0882627	6.49626	0.718911	0.00298743	0	0.00416595	0.00502244	0	0.00211724	0.191985	0.0556288	0	0.00381822	0.00234677	0.0018877	0	0.00867621	1.39306
		S. cerevisiae repl 2	0.00371664	0.00130203	0.00901776	0.0321718	0.0161617	0.00371836	0.223934	0.108511	0.00465355	0.0110862	0.0213388	0.0158844	0.00643781	0.0534073	2.44891	2.53318	0.00158792	0.0152696	0.0659023	0.0725726	0.0542306	1.08173	91.7831	68.2125	0.00483094	0.00240255	0.0015397	0.00127964	0	0.221569	14.3468	1.27285	0.00276078	0.000740572	0	0	0.00124347	0.00305185	0.168845	0.0479753	0.00222516	0.00350308	0.000988578	0.00261095	0.00196682	0.0141639	1.01491
		S. cerevisiae repl 3	0.00171395	0.00145839	0.00948806	0.03264	0.00915924	0.00425251	0.191876	0.0954395	0.00430362	0.00948295	0.0187563	0.0113076	0.00348412	0.0552962	2.33185	2.33399	0.00157425	0.00960221	0.0494882	0.0716179	0.038724	0.853369	93.8514	70.3863	0.00334612	0.00515548	0.00127609	0.00102905	0.00282819	0.151797	12.7557	1.17507	0.00135106	0.00169862	0.000981348	0.00145328	0	0.00143624	0.125681	0.0244519	0.00165602	0.00444503	0.00128291	0.00199336	0.00266634	0.0152807	0.703492
		S. cerevisiae repl 4	0.00263563	0.00199691	0.00586041	0.0207822	0.0152264	0.00364876	0.243515	0.131646	0.00265582	0.0188532	0.0149071	0.0293002	0.00249981	0.0496731	2.91287	4.08275	0.00143895	0.0114253	0.0447506	0.0655988	0.0274502	0.843867	90.9149	106.519	0.00207216	0.00248145	0	0.00154724	0	0.151126	14.9266	2.11492	0.00342118	0	0	0.00105352	0	0.00234196	0.251537	0.06902	0.00190147	0.00338814	0	0.00134718	0	0.011585	1.56385
	9	S. cerevisiae with acetic acid repl 1	0.00477439	0.00562195	0.032128	0.17907	0.0991677	0.030372	0.25693	0.0566494	0.00618598	0.0350549	0.091372	0.0764634	0.0322317	0.212811	12.9883	15.7281	0	0.11714	0.335506	0.475427	0.245146	7.76109	645.043	692.015	0.00697866	0.00885061	0.00435366	0.00873781	0.00384146	1.66973	52.414	12.4968	0.00795122	0.0163659	0.00615244	0.0107896	0.00634146	0.00780488	0.124573	0.0315244	0.00492683	0.025503	0.005	0.00707927	0.00857622	0.0287774	1.27609
		S. cerevisiae with acetic acid repl 2	0.008055	0.0066815	0.0411334	0.158489	0.0854395	0.0184886	0.180129	0.076197	0.00821238	0.0623404	0.0783753	0.0685569	0.0254312	0.237193	11.6947	13.2756	0.0111525	0.0594682	0.317185	0.411688	0.166909	5.84713	521.142	556.279	0.0305997	0.0187533	0.0071751	0.013295	0	1.44376	59.3515	7.89608	0.00914593	0.00578729	0.0108664	0	0	0.00609848	0.199218	0.0405576	0.00673873	0.0230955	0.00500039	0.00715722	0.012315	0.0320841	1.66821
		S. cerevisiae with acetic acid repl 3	0.0147258	0	0.0204877	0.109548	0.0544627	0.0171121	0.164849	0.0414209	0.00670588	0.024188	0.0561505	0.0442792	0.0208577	0.151181	8.82768	11.9971	0.0112822	0.0487574	0.190808	0.390644	0.162742	4.5485	397.798	564.637	0	0.0167345	0.009938	0	0.00705326	1.15222	50.3673	6.36087	0.00675875	0	0	0.00578458	0.00699662	0	0.111312	0.0479456	0	0.0208275	0.00604511	0.0083597	0.00674364	0.0327818	1.31963
		S. cerevisiae with acetic acid repl 4	0.00745559	0	0.0630655	0.113298	0.0734763	0.00819102	0.0709327	0.0219957	0	0.14644	0.043492	0.0690097	0.0195127	0.0775651	4.91656	7.71372	0	0.0227176	0.120126	0.108089	0.0539906	3.93918	330.032	339.781	0	0.0310908	0	0	0	0.700866	30.3448	4.19867	0.028537	0	0.0676266	0	0	0	0.0365594	0.0169657	0	0.0129478	0.0399532	0.00672015	0	0.018224	0.713071
Z. bailii	0	Z. bailii repl 1	0.00788778	0	0.0106896	0.0924135	0.0806463	0.0127878	0.0158411	0.0209735	0.0044415	0.00510497	0.454812	0.654301	0.0443769	0.0287493	0.603824	13.4274	0.00402735	0.0081202	0.0623859	1.04173	0.274688	0.491423	30.4281	2096.84	0.0067531	0.00687566	0.00480493	0.00504581	0.00452813	0.0333218	6.8264	690.401	0.0061023	0	0.00444995	0.00416258	0.00994371	0.00748419	0.00552546	0.00818359	0.00778424	0.0264842	0	0.00559941	0.0457039	0.0314074	0.0827551
		Z. bailii repl 2	0.00684095	0	0.0127412	0.105868	0.0863801	0.00658311	0.00646224	0.0186575	0.00457272	0.00364408	0.411505	0.729156	0.0651442	0.0423732	0.622204	10.3082	0.00664757	0.00645419	0.0823493	1.08824	0.312609	0.70316	37.9996	2777.07	0.00313443	0.00559202	0.00367832	0.00677246	0.00493935	0.0502012	11.5971	1042.65	0.0114822	0.00794888	0.00297731	0.003493	0.00435718	0.00325127	0.00547518	0	0.00400063	0.023055	0.00794082	0.00300349	0.0464846	0.0147314	0.0616008
		Z. bailii repl 3	0.00541001	0	0.00944803	0.0301942	0.0157909	0.00663909	0.00512938	0.0059453	0	0.0112306	0.20696	0.390818	0.0235265	0.010108	0.156342	4.40358	0	0	0.0274866	0.532998	0.121684	0.205321	12.353	791.279	0	0	0	0	0.00522812	0.0253792	2.96173	245.202	0.00752517	0.00564387	0.00621034	0	0	0.00663909	0.00602845	0	0	0.0154947	0.00502024	0.0091726	0.040045	0.0195561	0.0442753
		Z. bailii repl 4	0.00728262	0	0.0110658	0.0616869	0.0485824	0.0144759	0.00707245	0.00924778	0	0.0203714	0.229618	0.462922	0.0246774	0.0233244	0.260569	5.47703	0	0	0.0445548	0.735837	0.160499	0.402465	23.9675	1623.08	0.0105614	0.00851216	0.00771349	0.015624	0.0068071	0.0267135	7.40156	704.658	0.01394	0	0.00646294	0.0127472	0.0128733	0	0.00646294	0.00763992	0	0.011318	0.0154086	0.00569054	0.039282	0.00943168	0.0417385
	24	Z. bailii with acetic acid repl 1	0.0297064	0.0307149	0.0351539	0.0917912	0.108185	0	0.0308609	0.0348051	0.029386	0.0271665	0.230423	0.657712	0.061147	0.0429857	0.362952	16.421	0	0	0.0482211	1.2673	0.144192	0.353405	33.7942	11476.6	0	0.0314924	0	0	0	0.0344046	7.93751	2748.27	0.0577541	0.0359078	0	0.0509165	0.0457094	0	0.0409123	0.0370388	0.0575373	0.0635503	0	0	0.0905895	0.0437491	0.05946
		Z. bailii with acetic acid repl 2	0	0.0624185	0.0263006	0.145356	0.266747	0.0885377	0.0272528	0.044796	0	0	0.26669	1.18163	0.0407999	0.036492	0.524209	21.4625	0	0.0162791	0.0758862	1.9102	0.29502	0.490313	34.0793	9414.99	0	0.0453685	0	0	0	0.0429595	10.2551	3114.7	0.0638696	0	0	0	0.0170047	0	0	0	0.016948	0.086996	0	0	0.0377844	0.0487411	0.0386573
		Z. bailii with acetic acid repl 3	0.00723282	0.0126075	0.0131783	0.112928	0.14739	0.0191586	0.0160321	0.0390338	0.0193013	0.00515588	0.181905	0.653154	0.062435	0.0360214	0.249918	18.2237	0.0196405	0.0251706	0.0686119	1.05679	0.20633	0.494882	27.3639	7876.99	0.0121572	0.0453375	0.00780358	0.0180836	0.0109459	0.0242193	6.96839	2107.95	0.166903	0.0119194	0.0227924	0.0795388	0.0161462	0.0188542	0.0477315	0.0242986	0.0156516	0.0264675	0.0133114	0.0261028	0.0272856	0.0165204	0.0263026
		Z. bailii with acetic acid repl 4	0.0193452	0	0.0667141	0.309047	0.162108	0.0116817	0.0219411	0.0203118	0	0.0157551	0.239792	0.72122	0.0309303	0	0.432306	27.1427	0	0.0172602	0.0336505	1.30059	0.23603	0.30982	32.8232	10431.6	0.0236534	0.0276577	0	0.0249375	0	0.022169	5.27607	2190.24	0.0262148	0	0	0.0266566	0.0272918	0	0.0163212	0	0	0.0179989	0	0	0.0152304	0.0259041	0.0234324
Statistics
Yeast	Acetic acid in culturing media (g/L)	Statistics on the replicates	IPC-A d32:0	IPC-A d34:0	IPC-A d36:0	IPC-A d38:0	IPC-A d40:0	IPC-A d42:0	IPC-A d44:0	IPC-A d46:0	IPC-B d/t32:0	IPC-B d/t34:0	IPC-B d/t36:0	IPC-B d/t38:0	IPC-B d/t40:0	IPC-B d/t42:0	IPC-B d/t44:0	IPC-B d/t46:0	IPC-C t32:0	IPC-C t34:0	IPC-C t36:0	IPC-C t38:0	IPC-C t40:0	IPC-C t42:0	IPC-C t44:0	IPC-C t46:0	IPC-D t32:0	IPC-D t34:0	IPC-D t36:0	IPC-D t38:0	IPC-D t40:0	IPC-D t42:0	IPC-D t44:0	IPC-D t46:0	M(IP)2C-A d32:0	M(IP)2C-A d34:0	M(IP)2C-A d36:0	M(IP)2C-A d38:0	M(IP)2C-A d40:0	M(IP)2C-A d42:0	M(IP)2C-A d44:0	M(IP)2C-A d46:0	M(IP)2C-B d/t32:0	M(IP)2C-B d/t34:0	M(IP)2C-B d/t36:0	M(IP)2C-B d/t38:0	M(IP)2C-B d/t40:0	M(IP)2C-B d/t42:0	M(IP)2C-B d/t44:0
S. cerevisiae	0	Average	0.00260667	0.00162357	0.00717502	0.0231616	0.0118207	0.00460161	0.189957	0.103569	0.00387099	0.0108645	0.0165941	0.0155547	0.00387242	0.0427413	2.26731	2.57077	0.00265941	0.0111692	0.0458059	0.0578616	0.0332933	0.835436	87.2986	69.9013	0.00341641	0.00298308	0.0014079	0.00128531	0.00219521	0.153189	12.1313	1.32044	0.00263011	0.00121959	0.00257365	0.00250975	0.00124347	0.00223682	0.184512	0.049269	0.00192755	0.00378862	0.00153942	0.0019598	0.00231658	0.0124265	1.16883
	9		0.00875268	0.00615172	0.0392037	0.140101	0.0781365	0.0185409	0.16821	0.0490657	0.00703475	0.0670058	0.0673474	0.0645773	0.0245083	0.169687	9.6068	12.1786	0.0112174	0.0620209	0.240906	0.346462	0.157197	5.52398	473.504	538.178	0.0187892	0.0188573	0.00715559	0.0110164	0.00544736	1.24165	48.1194	7.7381	0.0130982	0.0110766	0.0282151	0.00828711	0.00666904	0.00695168	0.117916	0.0342483	0.00583278	0.0205935	0.0139997	0.00732908	0.00921162	0.0279668	1.24425
Z. bailii	0		0.00685534	0	0.0109862	0.0725406	0.0578499	0.0101215	0.00862628	0.013706	0.00450711	0.0100878	0.325724	0.559299	0.0394313	0.0261387	0.410735	8.40405	0.00533746	0.00728719	0.0541942	0.849701	0.21737	0.450592	26.1871	1822.07	0.0068163	0.00699328	0.00539891	0.00914743	0.00537567	0.0339039	7.1967	670.727	0.0097624	0.00679638	0.00502513	0.00680093	0.00905807	0.00579152	0.00587301	0.00791176	0.00589243	0.019088	0.00945655	0.00586651	0.0428789	0.0187816	0.0575924
	24		0.0187615	0.035247	0.0353367	0.164781	0.171107	0.0397927	0.0240217	0.0347367	0.0243436	0.0160258	0.229703	0.80343	0.048828	0.0384997	0.392346	20.8125	0.0196405	0.01957	0.0565924	1.38372	0.220393	0.412105	32.0151	9800.05	0.0179053	0.037464	0.00780358	0.0215106	0.0109459	0.0309381	7.60927	2540.29	0.0786855	0.0239136	0.0227924	0.0523707	0.026538	0.0188542	0.0349884	0.0306687	0.0300456	0.0487532	0.0133114	0.0261028	0.0427225	0.0337287	0.0369631
S. cerevisiae	0	Median	0.00249805	0.00159767	0.00743909	0.026477	0.0121928	0.00398543	0.207905	0.101975	0.00430362	0.0102846	0.0168317	0.013596	0.00327603	0.0515402	2.39038	2.43359	0.00158108	0.0105138	0.0471194	0.0686084	0.0330871	0.848618	91.349	69.2994	0.00334612	0.002442	0.0014079	0.00127964	0.00219521	0.151462	13.5512	1.22396	0.00287411	0.00121959	0.00257365	0.00145328	0.00124347	0.0022296	0.180415	0.0518021	0.00190147	0.00366065	0.00128291	0.00194053	0.00231658	0.0128744	1.20398
	9		0.00775529	0.00615172	0.0366307	0.135893	0.0794579	0.0178003	0.172489	0.0490352	0.00670588	0.0486976	0.0672629	0.0687833	0.0231445	0.181996	10.2612	12.6364	0.0112174	0.0541128	0.253997	0.401166	0.164825	5.19782	459.47	560.458	0.0187892	0.0177439	0.0071751	0.0110164	0.00544736	1.29799	51.3906	7.12847	0.00854857	0.0110766	0.0108664	0.00828711	0.00666904	0.00695168	0.117942	0.036041	0.00583278	0.0219615	0.00552275	0.00711824	0.00857622	0.0304308	1.29786
Z. bailii	0		0.00706179	0	0.0108777	0.0770502	0.0646143	0.00971344	0.00676735	0.0139526	0.00450711	0.00816778	0.320561	0.558611	0.0345272	0.0260368	0.432196	7.89262	0.00533746	0.00728719	0.0534704	0.888785	0.217593	0.446944	27.1978	1859.96	0.0067531	0.00687566	0.00480493	0.00677246	0.00508373	0.0300176	7.11398	697.53	0.00950367	0.00679638	0.00533014	0.00416258	0.00994371	0.00663909	0.00577695	0.00791176	0.00589243	0.0192748	0.00794082	0.00564497	0.0428744	0.0171437	0.0529381
	24		0.0193452	0.0307149	0.0307272	0.129142	0.154749	0.0191586	0.024597	0.0369195	0.0243436	0.0157551	0.235108	0.689466	0.0509734	0.036492	0.397629	19.8431	0.0196405	0.0172602	0.0584165	1.28395	0.22118	0.421859	33.3087	9923.3	0.0179053	0.0384149	0.00780358	0.0215106	0.0109459	0.029312	7.45295	2469.25	0.0608118	0.0239136	0.0227924	0.0509165	0.0221482	0.0188542	0.0409123	0.0306687	0.016948	0.0450089	0.0133114	0.0261028	0.032535	0.0348266	0.03248
S. cerevisiae	0	Standard deviation	0.000834751	0.000307089	0.00248639	0.0120581	0.00459662	0.00148155	0.0633204	0.0223476	0.00106682	0.00612123	0.00436965	0.0100611	0.0017572	0.0202371	0.645231	1.13654	0.00225241	0.00300635	0.0176531	0.024333	0.017543	0.212445	9.84643	29.428	0.00138073	0.00147158	0.0001864	0.000259139	0.000895167	0.0544592	3.8672	0.582076	0.00089564	0.00067744	0.00225186	0.00218522	0	0.00066597	0.0524557	0.0186915	0.000285464	0.000473873	0.000714509	0.000518209	0.00049463	0.0029404	0.38581
	9		0.0042298	0.000749213	0.0180135	0.0341983	0.0189544	0.00911296	0.0763489	0.0229844	0.00105247	0.0553346	0.0215503	0.0140092	0.00573833	0.0712874	3.57766	3.35513	9.16944e-05	0.0398553	0.103062	0.162952	0.078553	1.69039	139.057	146.122	0.0167026	0.00920706	0.00279222	0.00322245	0.00227108	0.418151	12.4578	3.51636	0.0103386	0.00748017	0.0342126	0.00353911	0.000463269	0.00120661	0.0666255	0.0133358	0.00128121	0.00544291	0.0173093	0.000712956	0.0028395	0.00672595	0.395218
Z. bailii	0		0.00105478	0	0.00135895	0.0337473	0.0326011	0.00411167	0.0048778	0.00724427	9.27916e-05	0.00760281	0.125649	0.158694	0.019632	0.0133576	0.237535	4.22023	0.00185278	0.00117805	0.0235657	0.262705	0.0908222	0.206504	10.8602	834.597	0.00371388	0.00146362	0.00208213	0.00567494	0.000996572	0.0114063	3.53447	327.076	0.00359682	0.00162989	0.00163263	0.00516051	0.0043266	0.00224014	0.000465916	0.000384431	0.00267542	0.00692158	0.00535747	0.00253176	0.00373944	0.00937792	0.0189554
	24		0.0112482	0.0252129	0.0227832	0.0986682	0.0676994	0.0423797	0.00646474	0.0104521	0.00713098	0.0110078	0.035379	0.254042	0.0155101	0.00389211	0.115664	4.7075	0	0.00487502	0.0192625	0.367211	0.0627642	0.094651	3.14709	1533.64	0.00812899	0.00924295	0	0.00484643	0	0.00963621	2.07869	477.025	0.0610825	0.0169624	0	0.0264711	0.0137476	0	0.0165219	0.00900867	0.0238173	0.0322694	0	0	0.0332152	0.0150901	0.0163881
S. cerevisiae	0	Variance	6.96809e-07	9.43037e-08	6.18214e-06	0.000145398	2.11289e-05	2.19499e-06	0.00400947	0.000499415	1.1381e-06	3.74695e-05	1.90938e-05	0.000101226	3.08775e-06	0.00040954	0.416323	1.29172	5.07335e-06	9.03814e-06	0.000311632	0.000592095	0.000307757	0.0451329	96.9522	866.007	1.90642e-06	2.16555e-06	3.4745e-08	6.7153e-08	8.01324e-07	0.0029658	14.9552	0.338812	8.02171e-07	4.58925e-07	5.07087e-06	4.77519e-06	0	4.43516e-07	0.0027516	0.000349372	8.14897e-08	2.24556e-07	5.10523e-07	2.68541e-07	2.44659e-07	8.64595e-06	0.148849
	9		1.78912e-05	5.6132e-07	0.000324486	0.00116952	0.000359269	8.3046e-05	0.00582915	0.000528283	1.10769e-06	0.00306192	0.000464415	0.000196258	3.29284e-05	0.00508189	12.7997	11.2569	8.40786e-09	0.00158844	0.0106218	0.0265534	0.00617057	2.85742	19336.8	21351.6	0.000278977	8.477e-05	7.79649e-06	1.03842e-05	5.1578e-06	0.17485	155.197	12.3648	0.000106887	5.59529e-05	0.0011705	1.25253e-05	2.14618e-07	1.45591e-06	0.00443896	0.000177844	1.6415e-06	2.96253e-05	0.000299612	5.08306e-07	8.06276e-06	4.52384e-05	0.156197
Z. bailii	0		1.11256e-06	0	1.84675e-06	0.00113888	0.00106283	1.69058e-05	2.37929e-05	5.24794e-05	8.61028e-09	5.78027e-05	0.0157877	0.0251838	0.000385415	0.000178425	0.0564229	17.8103	3.43279e-06	1.3878e-06	0.000555342	0.0690139	0.00824867	0.0426439	117.944	696552	1.37929e-05	2.14218e-06	4.33527e-06	3.22049e-05	9.93156e-07	0.000130104	12.4925	106979	1.29371e-05	2.65654e-06	2.66548e-06	2.66309e-05	1.87195e-05	5.01823e-06	2.17078e-07	1.47787e-07	7.15787e-06	4.79083e-05	2.87025e-05	6.40981e-06	1.39834e-05	8.79454e-05	0.000359307
	24		0.000126522	0.00063569	0.000519074	0.00973541	0.00458321	0.00179604	4.17929e-05	0.000109246	5.08509e-05	0.000121172	0.00125167	0.0645373	0.000240563	1.51485e-05	0.0133782	22.1606	0	2.37658e-05	0.000371044	0.134844	0.00393934	0.00895881	9.90418	2.35205e+06	6.60805e-05	8.54321e-05	0	2.34879e-05	0	9.28565e-05	4.32095	227553	0.00373107	0.000287723	0	0.000700719	0.000188997	0	0.000272973	8.11561e-05	0.000567264	0.00104131	0	0	0.00110325	0.000227711	0.00026857
All data are expressed as apperent quantities and calculated relative to the appropriate internal standard. See Materials and Methods for more information.
[truncated: 49 more columns]

## Sheet: Sterols
Sterols
Raw data
Yeast	Acetic acid in culturing media (g/L)	Biological replicates	Ergosterol (nmol)	Ergosterol ester (nmol)
S. cerevisiae	0	S. cerevisiae repl 1	96.9892	55.5812
		S. cerevisiae repl 2	37.6006	29.0743
		S. cerevisiae repl 3	36.8699	18.8827
		S. cerevisiae repl 4	24.5682	16.525
	9	S. cerevisiae with acetic acid repl 1	12.1833	33.4723
		S. cerevisiae with acetic acid repl 2	16.2078	19.4056
		S. cerevisiae with acetic acid repl 3	15.9087	18.6028
		S. cerevisiae with acetic acid repl 4	16.0206	28.1819
Z. bailii	0	Z. bailii repl 1	12.4542	11.6166
		Z. bailii repl 2	21.3044	12.4394
		Z. bailii repl 3	21.2897	12.9055
		Z. bailii repl 4	15.4612	9.50177
	24	Z. bailii with acetic acid repl 1	14.3244	6.77352
		Z. bailii with acetic acid repl 2	14.2001	6.49895
		Z. bailii with acetic acid repl 3	16.0466	6.78497
		Z. bailii with acetic acid repl 4	35.0066	11.4038
Statistics
Yeast	Acetic acid in culturing media (g/L)	Statistics on the replicates	Ergosterol (nmol)	Ergosterol ester (nmol)
S. cerevisiae	0	Average	33.0129	21.494
	9		15.0801	24.9157
Z. bailii	0		17.6274	11.6158
	24		19.8944	7.86531
S. cerevisiae	0	Median	37.2352	23.9785
	9		15.9647	23.7938
Z. bailii	0		18.3754	12.028
	24		15.1855	6.77925
S. cerevisiae	0	Standard deviation	7.32245	6.66977
	9		1.93515	7.16697
Z. bailii	0		4.41161	1.50674
	24		10.11	2.36269
S. cerevisiae	0	Variance	53.6183	44.4858
	9		3.74479	51.3655
Z. bailii	0		19.4623	2.27026
	24		102.211	5.58232
All data are expressed in nmol per 25 OD of cells. See Materials and Methods for more information.
